1

## 2 **Symmetric assembly and disassembly of an ecological network**

3

4 Jason M. Tylianakis<sup>1,2</sup>, Laura B. Martínez-García<sup>3,4</sup>, Sarah J. Richardson<sup>3</sup>, Duane A.  
5 Peltzer<sup>3</sup>, Ian A. Dickie<sup>3,5</sup>

6

7 <sup>1</sup> Centre for Integrative Ecology, School of Biological Sciences, University of Canterbury, Private Bag  
8 4800, Christchurch 8140, New Zealand.

9 <sup>2</sup> Department of Life Sciences, Imperial College London, Silwood Park Campus, Buckhurst Road, Ascot,  
10 Berkshire SL5 7PY, United Kingdom

11 <sup>3</sup> Landcare Research, PO Box 69040, Lincoln 7640, New Zealand

12 <sup>4</sup> Department of Soil Quality, Wageningen University. P.O. Box 47. Wageningen 6700 AA, The  
13 Netherlands

14 <sup>5</sup> Bio-protection Research Centre, Lincoln University, PO Box 85084, Lincoln 7647, New Zealand

15

### 16 **Abstract**

17 The position of species in interaction networks can predict their extinction  
18 probability. However, the processes whereby these network roles emerge and  
19 persist, then decay during ecosystem development are unknown. Here we study  
20 networks of plant and arbuscular mycorrhizal fungal (AMF) communities along a  
21 120,000 yr soil chronosequence, with two distinct phases: progressive (i.e. assembly,  
22 where plant richness and biomass increase) and retrogressive (i.e. disassembly,  
23 where plant richness and biomass decline with declining nutrients). We find that the  
24 order of interaction formation during progression mirrors that of interaction  
25 extinction during retrogression, and that interactions in sites moving forwards or  
26 backwards from the (12,000 yr) site of peak biomass were nested subsets of the  
27 interactions at that site. Network assembly and disassembly were symmetrical, self-  
28 reinforcing processes that together generated key attributes of network architecture.  
29 Plant species that had high AMF-partner overlap with others in the community  
30 (measured as 'closeness centrality') were best able to attract and retain new AMF  
31 partners, and AMF species with high partner overlap were better able to retain their  
32 interactions with plants. In contrast, interaction generalism ('node degree') per se  
33 was a poor predictor of partner attraction during assembly or retention during

34 disassembly. These results could be used to predict extinction sequences based on  
35 community assembly or network roles, identify focal points for invasions, and  
36 suggest trajectories for ecosystem restoration.

37

38 Keywords: community assembly, succession, ecosystem development, retrogression,  
39 mutualist network, mycorrhizal symbiosis, preferential attachment

40

41

## 42 **Introduction**

43 The arrangement of species interactions in ecological networks can be critical for the  
44 stability and functioning of ecosystems (1-3). However the processes that generate  
45 and maintain network structure during ecosystem development are unresolved. The  
46 generally accepted hypothesis for complex network assembly is that new nodes (e.g.,  
47 species) preferentially connect with those that are linked to many immediate  
48 neighbors (4) (i.e. generalist nodes of high 'degree'). This 'preferential attachment'  
49 was predicted (5), then shown empirically (6), to occur during the assembly of  
50 pollination networks within a season. In contrast, a study of long-term changes to  
51 pollination networks found that less-connected species preferentially attracted new  
52 interactions (7), such that the importance of preferential attachment based on node  
53 degree remains unclear for ecological networks. Although studies on the generation  
54 of network architecture have largely focused on node attachment during network  
55 assembly, the opposing process of preferential detachment can theoretically  
56 produce the same architecture as preferential attachment (8, 9). This possibility is  
57 strengthened by empirical findings that pollination networks show preferential loss  
58 of less-connected species and their interactions (7, 10). Finally, it is possible that  
59 network architecture may be generated by preferential attachment during  
60 community assembly, and maintained by preferential detachment during  
61 disassembly. This would imply that the same rules may operate during both the  
62 assembly and disassembly of ecological networks (11), but this hypothesis remains  
63 untested.

64

65 Here we study interaction network assembly and disassembly in a community of  
66 plants and arbuscular mycorrhizal fungi (AMF)(12) throughout 120,000 years of  
67 ecosystem development. Arbuscular mycorrhizal fungi are essential mutualists of  
68 most terrestrial plants (13), and have typical within-site diversity comparable to  
69 plant communities (14). Moreover, the high importance of species interactions for  
70 determining AMF community composition (15, 16) demands a focus on interactions  
71 (17) for these systems, within the context of soil nutrients which can also be  
72 important drivers of community structure (18). First, we test whether network  
73 assembly and disassembly processes are random or related to species' position in  
74 the network. Second, we test the hypothesis (11) that attachment and detachment  
75 are symmetrical, such that the process and order of disassembly mirror those during  
76 assembly. Finally, we use simulations to determine how non-random assembly and  
77 disassembly processes impact upon key aspects of network architecture.

78

79 The first requirement for an interaction to take place is an encounter, and if co-  
80 occurrence rates between AMF propagules and plants were merely stochastic (19),  
81 we would expect newly-arriving species to interact preferentially with the most  
82 abundant species in the site. An established AMF species that has used its  
83 associations with many plant species to develop an extensive mycelium network  
84 could also be a beneficial partner, due to a reduction in initial construction costs and  
85 immediate access to a large soil volume (20, 21). In this sense, the local abundance  
86 of a species, along with the number of species with which it interacts, may partly  
87 indicate its quality as a mutualist. If plants or AMF exhibit selectivity in their  
88 interaction partners (22), we might therefore expect a general pattern of newly-  
89 arriving species having a greater probability of interacting with generalist species, i.e.  
90 traditional preferential attachment based on species degree (4, 6). This pattern  
91 could also occur simply if generalists are least selective in the partners they accept.  
92 Moreover, high AMF diversity can reduce competition among plant species and  
93 provide insurance against variability in soil conditions, such that plant species that  
94 interact with many AMF experience increased biomass (23). This greater biomass  
95 could make AMF-generalist plants more attractive partners because they have the  
96 capacity to provide more carbon across a wider range of conditions.

97

98 However, the benefits of interacting with generalists may depend in part on whether  
99 they share their interaction partners with other species. Although AMF typically  
100 interact with many plant species, there is growing evidence that their composition  
101 (15) and fitness can differ across plant hosts (24). Host-plant selectivity may not  
102 necessarily be species specific, but rather groups of AMF can associate with  
103 ecological groups of plants (25). Closely-related AMF also tend to co-occur in a given  
104 location (26), and closely-related organisms tend to share interaction partners (27).  
105 We may therefore expect large interacting consortia of ecologically-similar, and in  
106 some cases phylogenetically related, plants and fungi to form at a given successional  
107 stage, with the dominant consortium potentially differing between early-  
108 successional generalist species and later-successional forest species (14, 25). Thus, at  
109 each stage of ecosystem development, newly-arriving fungi may have a higher  
110 probability of interacting with plants in the dominant ecological group at that stage,  
111 which will already interact with species from the dominant fungal group. These plant  
112 species would not only (or even necessarily) be the most generalist individually, but  
113 they would have high AMF-partner overlap with other plant species in the dominant  
114 group at that stage (i.e. with the majority of species in the site). Species that have  
115 high interaction-partner overlap with others in the network may also receive fitness  
116 benefits from positive indirect effects (1), making them more reliable interaction  
117 partners. We therefore hypothesise that the attractiveness of a species to new  
118 arrivals may depend on its sharing of interaction partners with other species (see Fig.  
119 S1 for our approach to measuring partner overlap).

120

121 To test these hypotheses, we used a dataset (15) on plant-AMF networks that were  
122 sampled at different sites along a long-term (>120 kyr) chronosequence comprising  
123 all stages of ecosystem development, including retrogression (28). Chronosequences  
124 represent a powerful tool for understanding long-term co-ordinated changes  
125 amongst species and their interactions, resource availability and ecosystem  
126 processes (28). Strong gradients from initial N-limitation to eventual strong P-  
127 limitation of ecosystem processes drive turnover of plant and AMF species (15, 29).  
128 We treated ecosystem progression (during which plant species richness and biomass

129 increase (29)) as the assembly phase, and ecosystem retrogression (during which  
130 strong P-limitation causes a loss of plant diversity and biomass (29)) as the network  
131 disassembly phase. We defined attachment as the first ecosystem stage at which a  
132 plant or AMF species was observed along the chronosequence, and detachment as  
133 the final ecosystem stage in which a species was observed.

134

## 135 **Results**

136 In total our samples yielded 33 operational taxonomic units (OTUs, hereafter  
137 referred to as species) of AMF and 53 species of plant, among which we observed  
138 399 pairwise interactions (i.e. links, defined as the colonisation of a plant root by an  
139 AMF species) (Fig. 1). There were an average of 16 AMF (SD = 3.33) and 10.8 (SD =  
140 3.77) plant species, with 137.5 (SD = 24.14) interactions per site (Table S1). The AMF  
141 community changes and turnover along the chronosequence have been described in  
142 detail elsewhere (15).

143

144 We first tested whether preferential attachment or detachment occurs to existing  
145 species that have many partners or high partner overlap. Newly arriving AMF species  
146 were significantly more likely to interact with plant species that shared fungal  
147 partners with many others (Fig. 2A,  $P = 1.4 \times 10^{-8}$ ), but not those with many partners  
148 (i.e. high 'degree';  $P = 0.401$ ) (Table S2). In contrast, plants showed no preferential  
149 attachment based on partner overlap (Fig. 2B) or degree of AMF ( $P > 0.4$  in both  
150 cases, Table S2). However, preferential detachment occurred in both taxa, such that  
151 plants and AMF were significantly less likely to be lost from the network during  
152 ecosystem retrogression if they interacted with species that had high partner  
153 overlap with others in the community ( $P < 1.8 \times 10^{-5}$  in both cases; Fig. 2C,D; Table  
154 S2).

155

156 As hypothesized previously (11), the disassembly process mirrored the assembly  
157 process; the last interactions to form during assembly were the first to be lost during  
158 ecosystem retrogression (Fig. 3,  $P = 1.64 \times 10^{-9}$ ). Moreover, the interactions present  
159 in sites moving forwards or backwards from the site of peak biomass were nested  
160 subsets of those present at that site ( $P < 0.001$  in both cases), such that interactions

161 progressively accumulated during progression but were sequentially lost during  
162 retrogression. Thus, symmetrical assembly and disassembly processes, either of  
163 which could theoretically generate complex network architecture (1, 4, 8, 9), both  
164 operated to rapidly generate architecture that did not change significantly  
165 throughout ecosystem development (SI Results, Table S3, Fig. S2).

166  
167 Although degree and partner overlap were correlated in our networks (Fig. S3), we  
168 found no evidence of preferential detachment of plants from AMF of low degree ( $P =$   
169  $0.577$ ), and AMF taxa even had *increased* detachment probability when they  
170 associated with nodes of high degree ( $P = 0.040$ ), as has been observed in a long-  
171 term study of pollination networks (7), and this relation became stronger when  
172 partner overlap was also included in the model (Table S2). Moreover, in all our  
173 models, partner overlap predicted attachment or detachment probability better  
174 than did equivalent models with only degree as the predictor, and its effect  
175 remained qualitatively unchanged when degree was also included in the model  
176 (Table S2, S4).

177  
178 Our findings suggest that both attachment and detachment are key processes in  
179 network development and, when combined, the loss or gain of links becomes self-  
180 reinforcing (9). We simulated the processes observed here to explore the  
181 consequences for network architecture (SI Materials and Methods) and found that  
182 both preferential attachment and detachment processes were important for  
183 determining and maintaining the nestedness of the network (Fig. S4), a key element  
184 of ecological network architecture (1, 12) whereby specialists interact with species  
185 that also interact with generalists. Preferential attachment (based on degree or  
186 partner overlap) generated networks that were considerably more nested than  
187 random, and preferential detachment maintained this nestedness in the face of  
188 species extinctions (Fig. S4).

189

## 190 **Discussion**

191 Obviously species do not have information about the architecture of their interaction  
192 networks, so partner overlap must be associated with ecological characteristics that

193 make species more likely to attract and retain interaction partners. There are several  
194 potential, non-exclusive explanations for this attractiveness. The simplest would be if  
195 abundant species shared many partners due to a high probability of random  
196 encounters. In our dataset, there was a weak correlation between a species'  
197 abundance and partner overlap within sites. Moreover, the core of interacting  
198 generalists (i.e. the species involved in the majority of interactions in the network,  
199 and whose partners overlapped considerably with the rest of the community) was  
200 present throughout much of ecosystem development (see dark colors in top left of  
201 matrices in Fig. 1), and this ubiquity likely made them a reliable target for newly  
202 arriving species. However, causality cannot be inferred from these correlations in our  
203 dataset, as attraction of diverse fungal mutualists could equally cause longer-term  
204 persistence of plants (30). Most importantly, the relation between plant partner  
205 overlap and AMF attachment and detachment probability remained significant after  
206 controlling for abundance (SI Results, Table S4). In contrast, the effect of degree was  
207 eliminated or even reversed when we controlled for abundance, and the preferential  
208 detachment of plants from AMF species with low partner overlap became non-  
209 significant when controlling for abundance (SI Results, Table S4).

210

211 Therefore, although abundance likely plays some role, the attractiveness of plants  
212 with high partner overlap to AMF taxa reflects additional benefits to associating with  
213 those species. Plants may benefit from the AMF communities generated by other  
214 species (31), and plant-plant competition can be reduced (and plant biomass  
215 increased) by high AMF diversity (23). Thus, consortia of plants that are able to share  
216 diverse AMF communities with one another may grow better, and therefore have  
217 the ability to provide more carbon to AMF symbionts. These groupings may also  
218 reflect habitat preference of the species involved, with habitat generalist plant and  
219 AMF species interacting tightly during early succession and forest specialists during  
220 late succession (25), an hypothesis congruent with findings of partner specificity  
221 occurring at the level of ecological groups (14).

222

223 The potential benefits of interacting with high-partner-overlap species may be  
224 partially offset in newly-arriving plants because seedling performance can be

225 impaired by the AMF network of large heterospecific plants, which compete for  
226 AMF-mediated resources and deplete the nutrient pool (32, 33). Also, the high  
227 generality of AMF may mean that there is less variation across species in the extent  
228 to which they share plant hosts (evidenced by the range of x-axis values for AMF  
229 species being less than half that of plants Fig. 2A,B). Combined, these factors may  
230 explain the non-significant effect of AMF degree and partner overlap on plant  
231 attachment probability (Fig. 2B).

232

233 However, both plant and AMF species were less likely to be lost during retrogression  
234 if they interacted with species that had high partner overlap with others in their  
235 community (Fig. 2C,D). We hypothesized (based on the benefits described above)  
236 that mutually beneficial interactions will involve species with high partner overlap,  
237 and we observed that species that preferentially interacted with these core species  
238 were significantly more likely to persist during retrogression. The decline in soil P  
239 during ecosystem development likely makes plants increasingly dependent on AMF-  
240 provided P. Likewise, declining plant photosynthetic rates along the chronosequence  
241 (34) could increase competition among AMF for plant-derived carbon. Thus, the  
242 need to develop and maintain mutualists and avoid symbiotic ‘cheaters’ will intensify  
243 along the sequence, particularly during retrogression. Over time, both plants and  
244 AMF can reduce their resource allocation to less-beneficial partners (22), particularly  
245 when resources are scarce (35). The interactions that persist during retrogression  
246 may therefore be those that are most mutually beneficial. Previous work has found  
247 that species in late-successional plant-AMF networks tend to interact more  
248 frequently with a subset of their total range of partners (36), and a viable strategy  
249 may thus be to test a number of partners initially, then gradually restrict resource  
250 allocation to a subset of these that provide the greatest benefit (35) as resources  
251 become limiting. Congruent with this potential strategy, the most generalist plants  
252 tended to lose many AMF partners during retrogression (AMF detachment  
253 probability increased with host-plant degree). This process could easily occur at the  
254 level of plant individuals, but be reflected as a loss of links at the species level.

255



256 Finally, if our findings are found to generalize to other ecological networks, they  
257 would have several potential applications. First the symmetry of assembly and  
258 disassembly processes (Fig. 3) throughout long-term ecosystem development  
259 suggests that knowledge of assembly order for a given system could be used to  
260 predict the interactions most at risk of extinction, such as in using network  
261 information for conservation (37). Species reintroductions during restoration could  
262 also follow the reverse order of extinction and replace extinct species with others  
263 that fulfill the same network role, or focus on species that share interaction partners  
264 with others, and will then attract interactions with any new species that colonize.  
265 Similarly, non-native species should interact preferentially with high-partner-overlap  
266 species in the network, which could therefore be a focus for biosecurity monitoring  
267 to detect invasions early.

268

269 It is impossible to fully understand the architecture of complex networks in isolation  
270 from the dynamic processes that generate and maintain them (4). We have shown  
271 empirically that both preferential attachment and detachment underpinned the  
272 development of an ecological network under changing abiotic conditions. These  
273 symmetrical, self-reinforcing processes can generate and maintain important  
274 features of interaction network architecture (1, 4, 8, 9), and thereby link species  
275 colonization and extinction to emergent and potentially stabilizing (1, 2) ecosystem  
276 properties.

277

## 278 **Materials and Methods**

### 279 Dataset

280 We generated networks of interactions between vascular plants and arbuscular  
281 mycorrhizal fungi (AMF) using data from a study that examined AMF beta diversity  
282 and the importance of soil age vs. plant host for explaining AMF community  
283 structure (15). Sampling and sequencing methods can be found in that study or in  
284 the SI Materials and Methods, but we summarise the key points here. Sampling was  
285 conducted along the Franz Josef soil chronosequence, on the southern west coast of  
286 the South Island, New Zealand. An important feature of the Franz Josef  
287 chronosequence, which led us to select this site, is that strong soil nutrient gradients

288 (SI Materials and Methods) are associated with pronounced shifts in ecological  
289 community composition, structure and function, such that ecosystem development  
290 exhibits a clear progressive phase up to the 12,000 year old surface at which peak  
291 tree biomass occurs (we treated this as the assembly phase), and a retrogressive  
292 phase thereafter in which tree basal area (biomass) declines about three-fold (29,  
293 38) (the disassembly phase). We sampled fungal communities on roots at ten  
294 surfaces of the following ages (in years): <5, 15, 70, 290, 500, 1000, 5000, 12,000,  
295 60,000, 120,000 (SI Materials and Methods; Table S1).

296

297 At each site we sampled 50 root fragments, which then underwent a molecular  
298 analysis to identify the plant species, as well as any AMF OTUs present inside the  
299 root (see (15) or SI Materials and Methods). We did not assign weights to these links,  
300 as the hypotheses we test here relate to the initial formation of interactions, rather  
301 than their strength or frequency once formed.

302

### 303 Data analysis

304 We hypothesized that species entering the network for the first time during the  
305 progressive phase would associate non-randomly with other existing species based  
306 on their position within the network (i.e. preferential attachment (4)). We also  
307 hypothesized that the same would occur during the disassembly of the network,  
308 such that the probability of species going locally extinct from the network would  
309 depend on the network position of species with which they associate (i.e.  
310 preferential detachment (8, 10)). We tested for preferential attachment during the  
311 progressive phase (5 - 12,000 year-old) and preferential detachment during the  
312 retrogressive phase (12,000 – 120,000 year-old), representing respectively the  
313 assembly and disassembly of the network. We then examined the appearance  
314 (attachment) of new species in the network during assembly, and disappearance  
315 (detachment) of species during disassembly. A species was deemed to have attached  
316 during the progressive phase when it first appeared in the chronosequence. During  
317 the progressive phase, once a species had attached (i.e. a link was formed), it was  
318 deemed to remain part of the network for the remainder of ecosystem progression.  
319 This ensured that any species that appeared, disappeared then reappeared during

320 the progressive phase was not counted twice, which would give any species-specific  
321 interaction preferences of these species a disproportionate weighting in analyses.  
322 Finally, it prevented underestimation of degree or partner overlap due to imperfect  
323 sampling of the network in any given stage. Similarly, detachment was deemed to  
324 have occurred during the retrogressive phase when a species that had been present  
325 during the progressive phase was absent from a given site and all remaining sites  
326 along the sequence. Note that, because by definition attachment and detachment  
327 processes must occur during the interval between two chronosequence stages (e.g.,  
328 an interaction was present in site B that was not present in A), we treated the 12,000  
329 year-old site (which represented the community peak in diversity and biomass) as  
330 the 'peak' community, comprising the last stage of assembly and the first stage from  
331 which disassembly occurred.

332

### 333 *Preferential attachment and detachment*

334 We analyzed preferential attachment and detachment processes using generalized  
335 linear mixed effects models with binomial errors and the canonical logit link function,  
336 conducted in the lme4 package (39) in R (40). We used separate models to test for  
337 attachment processes during progression vs. detachment processes during  
338 retrogression, and for plants vs. AMF. The response variable in each model was  
339 binary, whereby each existing species in the network for each site was coded with a  
340 value of 0 (a newly-arriving species did not attach to it, or a species did not detach  
341 from it, in that site) or 1 (a new species attached to or detached from the species in  
342 that site). Site (surface along the chronosequence) was included as a random factor,  
343 such that preferential attachment was tested according to the relative network roles  
344 of the various species within a site, rather than comparing species across sites, which  
345 could be influenced by differences in the sizes of networks. The fixed predictor  
346 variable was either degree or centrality (defined below).

347

348 To measure overlap in the use of interaction partners among species at a given  
349 trophic level, we used closeness centrality (hereafter 'centrality', defined in Fig. S1)  
350 in the unipartite projection of the bipartite interaction network (41). Centrality is  
351 often correlated with degree (42), but carries additional information by measuring

352 the number of links from a focal species to all others in the network (not just  
353 immediate neighbors), and has been used as a measure of species' importance (42)  
354 or functional specialization (43) in mutualistic networks. In the unipartite projection,  
355 species at a given trophic level are linked if they share an interaction partner (Fig. S1),  
356 so high centrality indicates that a species shares many partners with other species  
357 that also share partners with many others. In contrast, species with low centrality  
358 interact with partners that are not used by the dominant consortium of tightly-  
359 interacting plants and AMF. Although centrality may be implicitly used to infer the  
360 nature of flows through a network (e.g. paths vs. walks, replication vs. spread), we  
361 do not make any assumption about the nature of flows, if any, in the plant-AMF  
362 network. Rather, we use closeness centrality simply as a measure of the extent to  
363 which different species share interaction partners within a trophic level. Centrality  
364 was calculated in the 'sna' package (44) in R, scaled within a given network (i.e.  
365 within each site).

366

367 We tested whether attachment to a node during assembly, or detachment from a  
368 node during disassembly, depended on that node's centrality (Fig. S1) or degree (the  
369 number of partners with which the species interacts, normalized within networks of  
370 a given site age). We used the centrality/degree of a node in the chronosequence  
371 stage immediately prior to that in which the new node attached or an existing node  
372 detached. This allowed us to compare the fit of models with centrality vs. degree as  
373 the predictor using the Akaike Information Criterion (AIC). Thus, the predictor  
374 variable in each model was either the degree or centrality of each existing species in  
375 the site, to which newly-arriving species either attached vs. did not, or detached vs.  
376 did not. For completeness, we also ran models with both of these predictors, to  
377 determine if any potential collinearity qualitatively altered their separate effect.  
378 None of our models showed any signs of overdispersion. We repeated these  
379 analyses controlling for species abundances in case sampling effort generated any  
380 spurious effects (see Controlling for the effect of species abundances in SI Materials  
381 and Methods).

382

383 We omitted from this analysis any links representing new species attaching to other  
384 newly-arriving species, because we could not ascribe a value of network position for  
385 those species to use as the predictor variable. However, these pairings among two  
386 newly-arriving species were rare, and the species involved typically also interacted  
387 with other species already present in the network. Across all sites, 20 newly-arriving  
388 plant species were associated with newly-arriving AMF, and of these, 16 species also  
389 attached to AMF species that were already present in the network, for which  
390 network position could be calculated. Similarly, of the 15 newly-arriving AMF species  
391 that attached to newly-arriving plants, 8 also attached to existing species.

392

### 393 *Arrival and extinction order*

394 We tested whether the arrival and disappearance (extinction) order of links in the  
395 ecological network through time occurred at random, or whether links that  
396 appeared first during progression were last to be lost from the network during  
397 retrogression. To test this, we analyzed the arrival and extinction order of each link  
398 (i.e. each association between a mycorrhizal species and a plant species). This  
399 analysis included both links of newly-arriving species (as in the preferential  
400 attachment analysis above) and links that formed among existing species. Arrival  
401 order was defined as the rank age of the site at which the interaction was first  
402 observed; e.g. an interaction observed at the earliest (< 5 year-old) site was given a  
403 value of 1, whereas an interaction first observed at the 1,000 year old site (6<sup>th</sup> along  
404 the sequence) was given a value of 6. We treated the network at the site of peak  
405 plant biomass (29) (12,000 years old) as the end point of the assembly phase, then  
406 examined the order in which interactions were lost during the retrogressive phase  
407 following this peak (i.e. the extinction order). Extinction order was defined, in the  
408 same way as arrival order, as the first site following the peak biomass site in which  
409 an interaction was not observed. For example, an interaction that was present at the  
410 peak biomass site but not the latter two sites was given an extinction order of 1, an  
411 interaction that was present at the peak biomass site and both of the remaining sites  
412 was given an extinction order of 3, etc. For the analysis we used only those  
413 interactions that were present in the peak biomass site, in order to be conservative;  
414 had we simply used the arrival order and extinction order (last site in which an

415 interaction occurred) of all interactions across the sequence, this would have biased  
416 us towards finding a significant result, because any interactions that only appeared  
417 once along the sequence, or appeared early and were gone by the site of peak  
418 biomass, would have generated an automatic correlation between their arrival and  
419 extinction orders.

420

421 Thus, our analysis focused on the network of the peak biomass site and tested  
422 whether the order in which interactions came into the network was correlated with  
423 the order in which they were lost from the network. We tested for a relationship  
424 between arrival and extinction order using a simple regression, with extinction order  
425 as the response variable and arrival order as the predictor variable, and each  
426 interaction (plant-mycorrhizal combination) was a replicate. There remained the  
427 possibility that any observed relationship could be driven by interactions that  
428 appeared only in the site of peak biomass, and hence would be last to arrive and first  
429 to go extinct. To account for this, we re-ran the analysis after removing interactions  
430 that were only present in the site of peak biomass.

431

432 A negative correlation between arrival and extinction order of interactions would  
433 suggest a gradual accumulation of interactions in the network up until the site of  
434 peak biomass, followed by a progressive loss of interactions. This would be expected  
435 to generate a pattern whereby the peak biomass site has a set of interactions, of  
436 which progressively older or younger sites have decreasing subsets. To test for such  
437 a pattern, we generated two matrices in which we ranked the sites according to their  
438 age (rows), either becoming progressively older or younger than the site of peak  
439 biomass, which was in the top row. Cells of the matrices depicted the presence or  
440 absence of each pairwise plant-AMF association (columns). We tested each matrix  
441 for nestedness, using the nestedness metric based on overlap and decreasing fill  
442 (NODF), with 999 permutations and a swap algorithm, using the `oecosimu` function  
443 in the `vegan` (45) package for R (40).

444

445 Simulations

446 To explore the consequences of preferential attachment and detachment based on  
447 centrality vs. degree, we conducted a set of simulations of network assembly and  
448 disassembly scenarios (more detail provided in SI Materials and Methods). At each  
449 time step, newly-arriving plant or AMF species would interact with one existing  
450 species, with a probability proportional to the existing species' degree (i.e. the  
451 Barabasi and Albert model (4)) or partner overlap (closeness centrality). We also ran  
452 a third scenario whereby attachment was random (equally probable attachment to  
453 any existing species), to provide a null point of comparison.

454

455 This assembly phase continued until networks contained 50 species of plant and 50  
456 of AMF. Subsequently, each network was subjected to a disassembly phase, using  
457 the same scenario (degree-based, centrality-based or random) as was used during  
458 that network's assembly. Alternating plant and AMF species were removed (i.e. went  
459 extinct) with a probability that was inversely proportional to the degree or closeness  
460 centrality of the species with which they interacted, such that species that interacted  
461 with species of high degree or high centrality were less likely to go extinct. As with  
462 the assembly phase, we ran a scenario of the disassembly phase whereby extinction  
463 was random.

464

465 Each scenario of the assembly and disassembly phases was run for 1000 replicates  
466 (each comprising multiple time steps). At each time step within each replicate, after  
467 species arrived or went extinct, we recorded the nestedness of the network using  
468 NODF, calculated using the `nestednodf` function in the `vegan` package (45) for R.  
469 Nestedness is a common feature of mutualistic networks (46), which has also been  
470 observed recently in plant-mycorrhizal networks (12) and has been shown to  
471 increase the persistence of networks (1, 2). We scaled the observed NODF by the  
472 distribution of NODF values obtained by randomizing the adjacency matrix using a  
473 null model (SI Materials and Methods).

474

## 475 References

- 476 1. Bastolla U, *et al.* (2009) The architecture of mutualistic networks minimizes  
477 competition and increases biodiversity. *Nature* 458(7241):1018-U1091.
- 478 2. Thebault E & Fontaine C (2010) Stability of Ecological Communities and the  
479 Architecture of Mutualistic and Trophic Networks. *Science* 329(5993):853-856.
- 480 3. Thompson RM, *et al.* (2012) Food webs: reconciling the structure and  
481 function of biodiversity. *Trends in ecology & evolution*.
- 482 4. Barabási A-L & Albert R (1999) Emergence of scaling in random networks.  
483 *Science* 286(5439):509-512.
- 484 5. Jordano P, Bascompte J, & Olesen JM (2003) Invariant properties in  
485 coevolutionary networks of plant-animal interactions. *Ecology letters* 6(1):69-  
486 81.
- 487 6. Olesen JM, Bascompte J, Elberling H, & Jordano P (2008) Temporal dynamics  
488 in a pollination network. *Ecology* 89(6):1573-1582.
- 489 7. Burkle LA, Marlin JC, & Knight TM (2013) Plant-pollinator interactions over  
490 120 years: loss of species, co-occurrence, and function. *Science*  
491 339(6127):1611-1615.
- 492 8. Salathé M, May RM, & Bonhoeffer S (2005) The evolution of network  
493 topology by selective removal. *Journal of the Royal Society Interface* 2(5):533-  
494 536.
- 495 9. König M, Tessone C, & Zenou Y (2012) Nestedness in Networks: A Theoretical  
496 Model and Some applications. *SIEPR Discussion Papers* 11(005):1-61.
- 497 10. Aizen MA, Sabatino M, & Tylianakis JM (2012) Specialization and Rarity  
498 Predict Nonrandom Loss of Interactions from Mutualist Networks. *Science*  
499 335(6075):1486-1489.
- 500 11. Bascompte J & Stouffer DB (2009) The assembly and disassembly of  
501 ecological networks. *Philosophical Transactions of the Royal Society B-*  
502 *Biological Sciences* 364(1524):1781-1787.
- 503 12. Montesinos-Navarro A, Segarra-Moragues JG, Valiente-Banuet A, & Verdu M  
504 (2012) The network structure of plant-arbuscular mycorrhizal fungi. *New*  
505 *Phytologist* 194(2):536-547.
- 506 13. Brundrett MC (2009) Mycorrhizal associations and other means of nutrition  
507 of vascular plants: understanding the global diversity of host plants by  
508 resolving conflicting information and developing reliable means of diagnosis.  
509 *Plant and Soil* 320(1-2):37-77.
- 510 14. Öpik M, Metsis M, Daniell T, Zobel M, & Moora M (2009) Large - scale  
511 parallel 454 sequencing reveals host ecological group specificity of arbuscular  
512 mycorrhizal fungi in a boreonemoral forest. *New Phytologist* 184(2):424-437.
- 513 15. Martínez - García LB, Richardson SJ, Tylianakis JM, Peltzer DA, & Dickie IA  
514 (2015) Host identity is a dominant driver of mycorrhizal fungal community  
515 composition during ecosystem development. *New Phytologist* 205(4):1565-  
516 1576.
- 517 16. Vályi K, Rillig MC, & Hempel S (2015) Land - use intensity and host plant  
518 identity interactively shape communities of arbuscular mycorrhizal fungi in  
519 roots of grassland plants. *New Phytologist* 205(4):1577-1586.



- 520 17. Powell JR, *et al.* (2015) Deterministic processes vary during community  
521 assembly for ecologically dissimilar taxa. *Nature communications* 6.
- 522 18. Krüger M, *et al.* (2015) The rise and fall of arbuscular mycorrhizal fungal  
523 diversity during ecosystem retrogression. *Mol. Ecol.* 24(19):4912-4930.
- 524 19. Encinas - Viso F, Alonso D, Klironomos JN, Etienne RS, & Chang ER (2015)  
525 Plant-mycorrhizal fungus co - occurrence network lacks substantial structure.  
526 *Oikos*.
- 527 20. Newman EI (1988) Mycorrhizal links between plants: their functioning and  
528 ecological significance. *Advances in Ecological Research* 18:243-270.
- 529 21. Simard SW & Durall DM (2004) Mycorrhizal networks: a review of their extent,  
530 function, and importance. *Canadian Journal of Botany* 82(8):1140-1165.
- 531 22. Kiers ET, *et al.* (2011) Reciprocal rewards stabilize cooperation in the  
532 mycorrhizal symbiosis. *science* 333(6044):880-882.
- 533 23. Wagg C, Jansa J, Stadler M, Schmid B, & Van Der Heijden MGA (2011)  
534 Mycorrhizal fungal identity and diversity relaxes plant-plant competition.  
535 *Ecology* 92(6):1303-1313.
- 536 24. Ehinger M, Koch AM, & Sanders IR (2009) Changes in arbuscular mycorrhizal  
537 fungal phenotypes and genotypes in response to plant species identity and  
538 phosphorus concentration. *New Phytologist* 184(2):412-423.
- 539 25. Davison J, Öpik M, Daniell TJ, Moora M, & Zobel M (2011) Arbuscular  
540 mycorrhizal fungal communities in plant roots are not random assemblages.  
541 *FEMS Microbiology Ecology* 78(1):103-115.
- 542 26. Horn S, Caruso T, Verbruggen E, Rillig MC, & Hempel S (2014) Arbuscular  
543 mycorrhizal fungal communities are phylogenetically clustered at small scales.  
544 *The ISME journal* 8(11):2231-2242.
- 545 27. Gómez JM, Verdú M, & Perfectti F (2010) Ecological interactions are  
546 evolutionarily conserved across the entire tree of life. *Nature* 465(7300):918-  
547 921.
- 548 28. Peltzer DA, *et al.* (2010) Understanding ecosystem retrogression. *Ecological*  
549 *Monographs* 80(4):509-529.
- 550 29. Richardson SJ, Peltzer DA, Allen RB, McGlone MS, & Parfitt RL (2004) Rapid  
551 development of phosphorus limitation in temperate rainforest along the  
552 Franz Josef soil chronosequence. *Oecologia* 139(2):267-276.
- 553 30. Scheublin TR, Van Logtestijn RSP, & Van Der Heijden MGA (2007) Presence  
554 and identity of arbuscular mycorrhizal fungi influence competitive  
555 interactions between plant species. *Journal of Ecology* 95(4):631-638.
- 556 31. Bever JD (2002) Negative feedback within a mutualism: host-specific growth  
557 of mycorrhizal fungi reduces plant benefit. *Proceedings of the Royal Society of*  
558 *London B: Biological Sciences* 269(1509):2595-2601.
- 559 32. Kytöviita MM, Vestberg M, & Tuomi J (2003) A test of mutual aid in common  
560 mycorrhizal networks: established vegetation negates benefit in seedlings.  
561 *Ecology* 84(4):898-906.
- 562 33. Janoušková M, Rydlová J, Püschel D, Száková J, & Vosátka M (2011)  
563 Extraradical mycelium of arbuscular mycorrhizal fungi radiating from large  
564 plants depresses the growth of nearby seedlings in a nutrient deficient  
565 substrate. *Mycorrhiza* 21(7):641-650.

- 566 34. Whitehead D, *et al.* (2005) Photosynthesis and reflectance indices for  
567 rainforest species in ecosystems undergoing progression and retrogression  
568 along a soil fertility chronosequence in New Zealand. *Oecologia* 144(2):233-  
569 244.
- 570 35. Bever JD (2015) Preferential allocation, physio - evolutionary feedbacks, and  
571 the stability and environmental patterns of mutualism between plants and  
572 their root symbionts. *New Phytologist* 205(4):1503-1514.
- 573 36. Bennett AE, *et al.* (2013) Arbuscular mycorrhizal fungal networks vary  
574 throughout the growing season and between successional stages. *PloS one*  
575 8(12):e83241.
- 576 37. Tylianakis JM, Laliberté E, Nielsen A, & Bascompte J (2010) Conservation of  
577 species interaction networks. *Biological Conservation* 143:2270-2279.
- 578 38. Wardle D, Bardgett R, Walker L, Peltzer D, & Lagerström A (2008) The  
579 response of plant diversity to ecosystem retrogression: evidence from  
580 contrasting long-term chronosequences. *Oikos* 117:93 -103.
- 581 39. Bates D, Maechler M, Bolker B, & Walker S (2014) lme4: Linear mixed-effects  
582 models using Eigen and S4), R package version 1.0-6.
- 583 40. Team RC (2013) R: A language and environment for statistical computing. (R  
584 Foundation for Statistical Computing, Vienna Austria), 3.0.1.
- 585 41. Gómez JM & Perfectti F (2012) Fitness consequences of centrality in  
586 mutualistic individual-based networks. *Proceedings of the Royal Society B:*  
587 *Biological Sciences* 279(1734):1754-1760.
- 588 42. Martín González AM, Dalsgaard B, & Olesen JM (2010) Centrality measures  
589 and the importance of generalist species in pollination networks. *Ecological*  
590 *Complexity* 7(1):36-43.
- 591 43. Dalsgaard B, *et al.* (2008) Pollination networks and functional specialization: a  
592 test using Lesser Antillean plant–hummingbird assemblages. *Oikos*  
593 117(5):789-793.
- 594 44. Butts CT (2014) sna: Tools for Social Network Analysis.), R package version  
595 2.3-2.
- 596 45. Oksanen J, *et al.* (2008) vegan: Community Ecology Package ([http://cran.r-](http://cran.r-project.org/)  
597 [project.org/](http://cran.r-project.org/)).
- 598 46. Bascompte J, Jordano P, Melian CJ, & Olesen JM (2003) The nested assembly  
599 of plant-animal mutualistic networks. *Proceedings of the National Academy*  
600 *of Sciences of the United States of America* 100(16):9383-9387.
- 601 47. Stevens PR (1968) A chronosequence of soils near the Franz Josef Glacier.  
602 PhD thesis (University of Canterbury, New Zealand).
- 603 48. Walker T & Syers J (1976) The fate of phosphorus during pedogenesis.  
604 *Geoderma* 15(1):1-19.
- 605 49. Allison V, Condon L, Peltzer D, Richardson S, & Turner B (2007) Changes in  
606 enzyme activities and soil microbial community composition along carbon  
607 and nutrient gradients at the Franz Josef chronosequence, New Zealand. *Soil*  
608 *Biology and Biochemistry* 39(7):1770-1781.
- 609 50. Jangid K, Whitman WB, Condon LM, Turner BL, & Williams MA (2013)  
610 Progressive and retrogressive ecosystem development coincide with soil  
611 bacterial community change in a dune system under lowland temperate  
612 rainforest in New Zealand. *Plant and soil* 367(1-2):235-247.

- 613 51. Dickie IA, *et al.* (2013) Mycorrhizas and mycorrhizal fungal communities  
614 throughout ecosystem development. *Plant and Soil* 367(1-2):11-39.
- 615 52. Lambers H, Raven JA, Shaver GR, & Smith SE (2008) Plant nutrient-acquisition  
616 strategies change with soil age. *Trends in Ecology & Evolution* 23(2):95-103.
- 617 53. Turner S, *et al.* (2014) Mineralogical impact on long-term patterns of soil  
618 nitrogen and phosphorus enzyme activities. *Soil Biology and Biochemistry*  
619 68:31-43.
- 620 54. Richardson SJ, Peltzer DA, Allen RB, & McGlone MS (2010) Declining soil  
621 fertility does not increase leaf lifespan within species: evidence from the  
622 Franz Josef chronosequence, New Zealand. *New Zealand Journal of Ecology*  
623 34(3):306-310.
- 624 55. Holdaway RJ, Richardson SJ, Dickie IA, Peltzer DA, & Coomes DA (2011)  
625 Species- and community-level patterns in fine root traits along a 120 000-  
626 year soil chronosequence in temperate rain forest. *Journal of Ecology*  
627 99(4):954-963.
- 628 56. Wardle DA, Walker LR, & Bardgett RD (2004) Ecosystem properties and forest  
629 decline in contrasting long-term chronosequences. *Science* 305:509-513.
- 630 57. Doblas-Miranda E, Wardle DA, Peltzer DA, & Yeates GW (2008) Changes in  
631 the community structure and diversity of soil invertebrates across the Franz  
632 Josef Glacier chronosequence. *Soil Biology and Biochemistry* 40(5):1069-1081.
- 633 58. Wardle P (1991) *Vegetation of New Zealand* (CUP Archive).
- 634 59. Öpik M & Moora M (2012) Missing nodes and links in mycorrhizal networks.  
635 *New Phytologist* 194(2):304-306.
- 636 60. Simon L, Lalonde M, & Bruns T (1992) Specific amplification of 18S fungal  
637 ribosomal genes from vesicular-arbuscular endomycorrhizal fungi colonizing  
638 roots. *Applied and Environmental Microbiology* 58(1):291-295.
- 639 61. Lee J, Lee S, & Young JPW (2008) Improved PCR primers for the detection and  
640 identification of arbuscular mycorrhizal fungi. *FEMS Microbiology Ecology*  
641 65(2):339-349.
- 642 62. Dickie I & FitzJohn R (2007) Using terminal restriction fragment length  
643 polymorphism (T-RFLP) to identify mycorrhizal fungi: a methods review.  
644 *Mycorrhiza* 17(4):259-270.
- 645 63. van Dorst J, *et al.* (2014) Community fingerprinting in a sequencing world.  
646 *FEMS microbiology ecology* 89(2):316-330.
- 647 64. White TJ, Bruns T, Lee S, & Taylor J (1990) Amplification and direct  
648 sequencing of fungal ribosomal RNA genes for phylogenetics. *PCR protocols:  
649 a guide to methods and applications* 18:315-322.
- 650 65. Taberlet P, Gielly L, Pautou G, & Bouvet J (1991) Universal primers for  
651 amplification of three non-coding regions of chloroplast DNA. *Plant molecular  
652 biology* 17(5):1105-1109.
- 653 66. Trewick S, *et al.* (2002) Polyploidy, phylogeography and Pleistocene refugia of  
654 the rockfern *Asplenium ceterach*: evidence from chloroplast DNA. *Mol. Ecol.*  
655 11(10):2003-2012.
- 656 67. Wirta HK, *et al.* (2014) Complementary molecular information changes our  
657 perception of food web structure. *Proceedings of the National Academy of  
658 Sciences* 111(5):1885-1890.

- 659 68. Toju H, Guimarães PR, Olesen JM, & Thompson JN (2014) Assembly of  
660 complex plant–fungus networks. *Nature communications* 5.  
661 69. Caruso T, Rillig MC, & Garlaschelli D (2012) On the application of network  
662 theory to arbuscular mycorrhizal fungi–plant interactions: the importance of  
663 basic assumptions. *New Phytologist* 194(4):891-894.  
664 70. Graham J & Eissenstat D (1994) Host genotype and the formation and  
665 function of VA mycorrhizae. *Plant and Soil* 159(1):179-185.  
666 71. Nguyen NH, Smith D, Peay K, & Kennedy P (2014) Parsing ecological signal  
667 from noise in next generation amplicon sequencing. *New Phytologist*.  
668 72. Hurst J & Allen R (2007) *A permanent plot method for monitoring indigenous*  
669 *forests – Field protocols* (Landcare Research, Lincoln, New Zealand),  
670 (Research L).  
671 73. Albrecht M, Riesen M, & Schmid B (2010) Plant-pollinator network assembly  
672 along the chronosequence of a glacier foreland. *Oikos* 119(10):1610-1624.  
673 74. Fahimipour AK & Hein AM (2014) The dynamics of assembling food webs.  
674 *Ecology Letters* 17(5):606-613.  
675 75. Kuznetsova A, Brockhoff P, & Christensen R (2013) lmerTest: Tests for  
676 random and fixed effects for linear mixed effect models (lmer objects of lme4  
677 package). *R package version:2.0-0*.  
678

679

## 680 **Acknowledgements**

681 We thank P.J. Bellingham, T. Fukami, J.H. Jones, S. Pawar, D.B. Stouffer and members  
682 of the Tylianakis/Stouffer lab for critical discussions and comments on the  
683 manuscript. N. Bolstridge and C. Mitchel provided valuable lab assistance. The  
684 research was funded by Core funding for Crown Research Institutes from the New  
685 Zealand Ministry of Business, Innovation and Employment's Science and Innovation  
686 Group, and a Rutherford Discovery Fellowship to JMT. This paper is a contribution to  
687 Imperial College's Grand Challenges in Ecosystems and the Environment initiative.

688

## 689 **Author contributions**

690 J.M.T. and I.A.D. designed the study, in discussion with all other authors. L.B.M.-G.  
691 and I.A.D. conducted molecular analyses. J.M.T. conducted statistical analyses. S.J.R.  
692 and D.A.P. collected plant abundance data. All authors contributed to field sampling  
693 and writing of the manuscript.

694

## 695 **Author information**

696 The authors declare no competing financial interests. Correspondence and requests  
697 for materials should be addressed to J.M.T. ([jason.tylianakis@canterbury.ac.nz](mailto:jason.tylianakis@canterbury.ac.nz)).

698

699

700

701

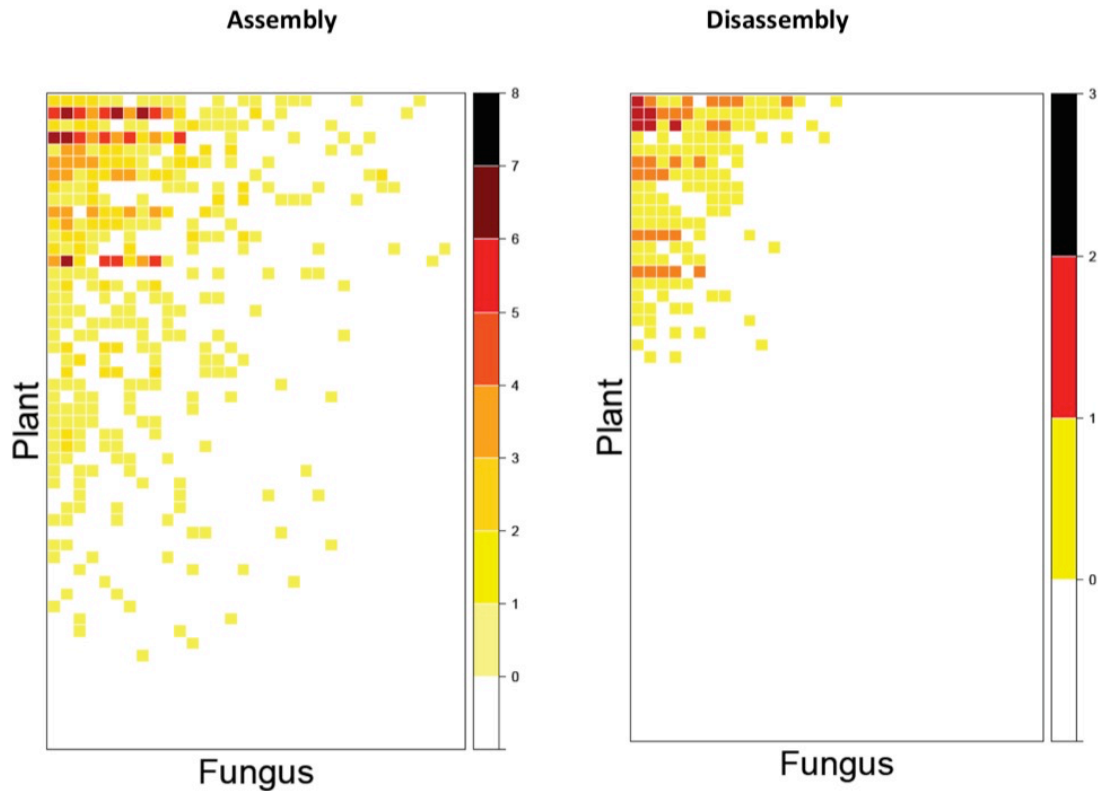

702

703 Figure 1: Plant-mycorrhizal association matrices during assembly (N = 8 sites) and  
704 disassembly (i.e. retrogressive, N = 3 sites) phases of ecosystem development.

705 Darker colours indicate that the plant-mycorrhizal association was present in a  
706 greater number of sites (i.e. it formed early during assembly or persisted during  
707 retrogression). The network is significantly nested (see SI Results), whereby  
708 specialists interact with proper subsets of the species that interact with generalists.

709

710

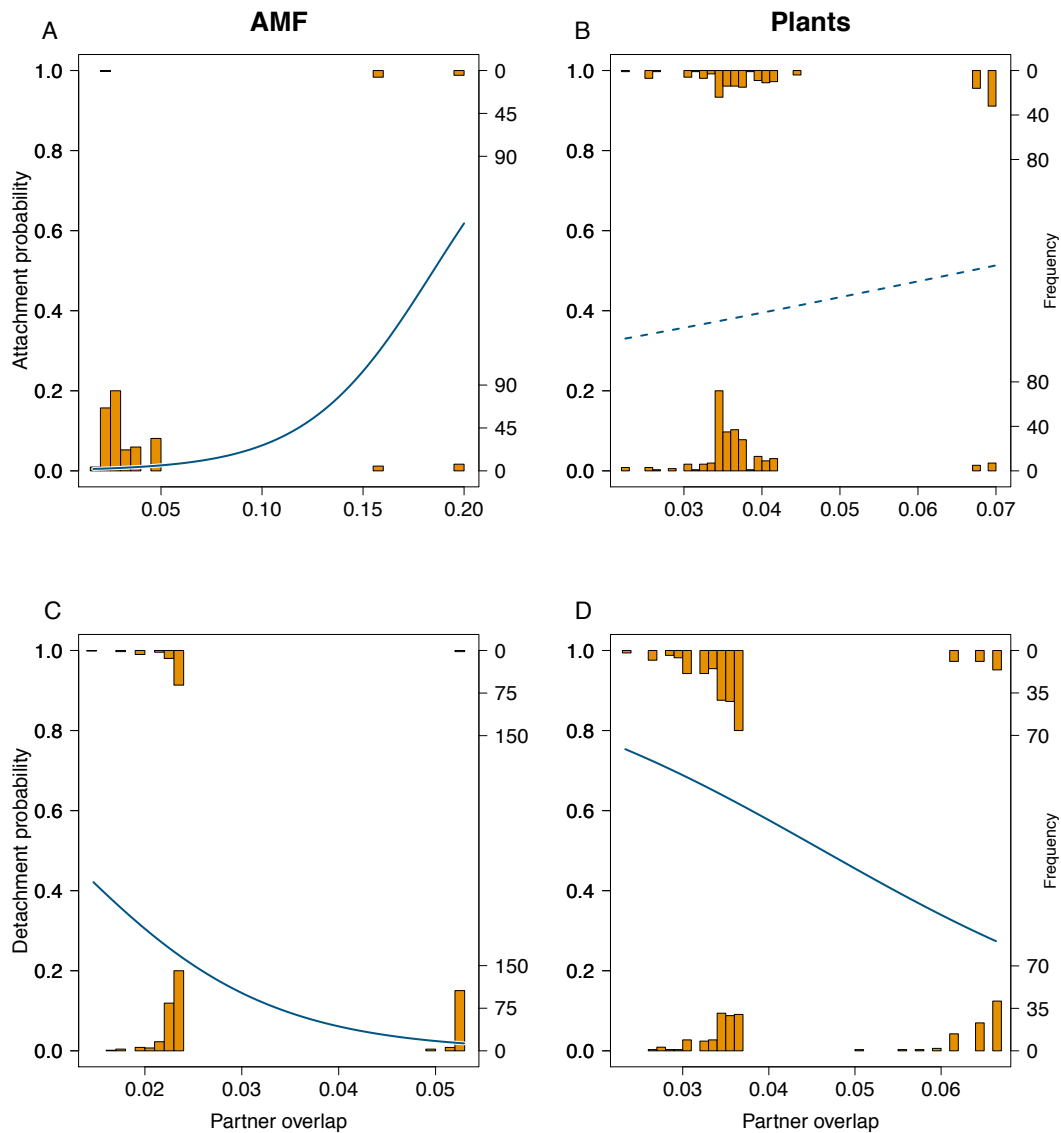

711

712 Figure 2: Probability (left vertical axis) that a new A,C) arbuscular mycorrhizal fungus  
713 (AMF), or B,D) plant entering the network will interact with an existing species  
714 during assembly (top), or detach from a species during disassembly (bottom) as a  
715 function of that species interaction-partner overlap with others of its trophic level  
716 (measured as closeness centrality of the unipartite projection, see Fig. S1).

717 Histograms top and bottom of each graph represent the frequencies (right vertical  
718 axis) of ones and zeroes respectively in the raw data. Trend lines are based on

719 inverse-linked coefficients of a binomial linear mixed effects model with

720 chronosequence stage (plant-mycorrhizal network) or year (arms trade network) as a

721 random effect. Solid lines were statistically significant ( $P < 0.005$  in all cases), dashed

722 line was not significant at  $\alpha = 0.05$ .

723

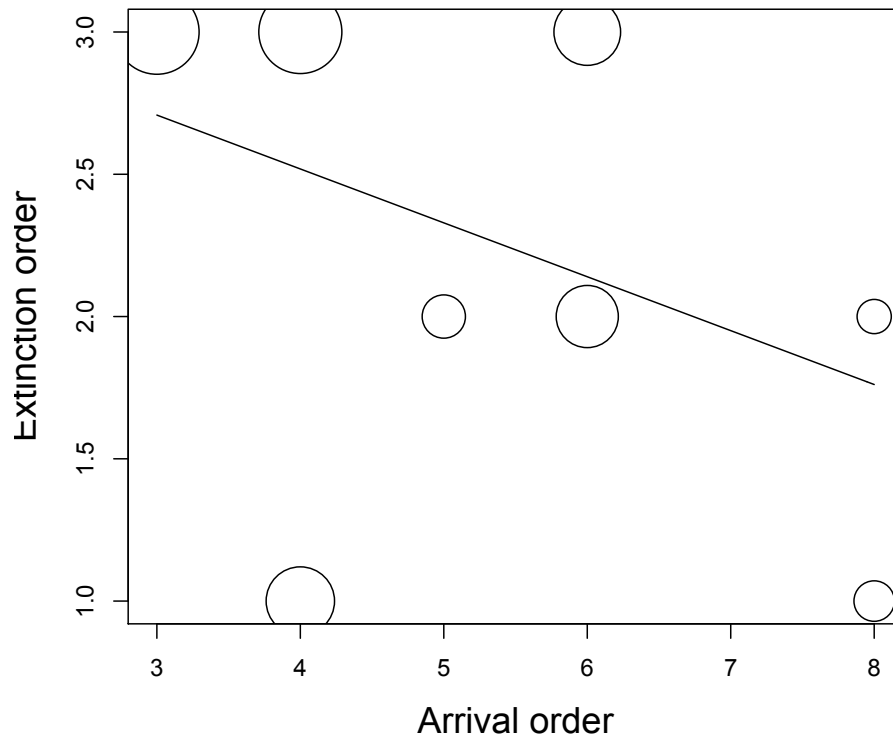

724

725 Figure 3: The relationship between the order in which plant-AMF interactions  
726 (network 'links') were formed (arrival order) and that in which they were lost  
727 (extinction order). Larger circles indicate more overlapping data points. There was a  
728 significant negative association between the formation and disappearance order of  
729 interactions ( $F_{1,269} = 39$ ,  $P < 0.0001$ ), such that the last interactions to form during  
730 network assembly were the first to be lost during disassembly. This analysis only  
731 included interactions that were present at the site of peak biomass (arrival order 8),  
732 so was not confounded by interactions that appeared in only one site (i.e. arrived  
733 and went 'extinct' instantly). The relationship was also not simply driven by  
734 interactions that appeared only in the site of peak biomass, as it remained significant  
735 even when these data points were removed ( $F_{1,245} = 5.38$ ,  $P < 0.022$ ).

736



737 **SI Materials and Methods**

738 Study site

739 We sampled interactions between vascular plants and arbuscular mycorrhizal fungi  
740 (AMF) along the Franz Josef soil chronosequence, on the southern west coast of the  
741 South Island, New Zealand. The sites are schist outwash surfaces that have been  
742 exposed during glacial retreat, and span a range of ages (since exposure) from more  
743 than 120,000 years to the present. An important feature of the Franz Josef  
744 chronosequence, which led us to select this site, is that strong soil nutrient  
745 gradients) are associated with pronounced shifts in ecological community  
746 composition, structure and function, such that ecosystem development exhibits a  
747 clear progressive phase up to the 12,000 year old surface at which peak tree biomass  
748 occurs (we treated this as the assembly phase), and a retrogressive phase thereafter  
749 in which tree basal area (biomass) declines about three-fold (29, 38) (the  
750 disassembly phase). We sampled fungal communities on roots at ten surfaces of the  
751 following ages (in years): <5, 15, 70, 290, 500, 1000, 5000, 12,000, 60,000, 120,000  
752 (Table S1).

753

754 The sampling sites occur between the terminus of the Franz Josef glacier (43.45° S,  
755 170.17° E) and the coast of central western South Island (43.25° S, 170.19° E) (29, 47).  
756 The current climate is highly oceanic and mean annual temperature (1926–1975) at  
757 the valley mouth is 10.8°C . Precipitation is ca. 6.5m for first seven sites of the  
758 sequence, which are within the glacier valley, and ca. 3.5m for the last three sites  
759 that lie between the valley mouth and the coast. Precipitation falls evenly  
760 throughout the year.

761

762 Inorganic phosphorus (P) is initially high (> 800 mg/kg), but declines to ca. 100 mg/kg  
763 by the oldest stage (29). Declining phosphorus is associated with a shift from plant-  
764 available mineral forms to organic forms. Mineral soil nitrogen and carbon  
765 concentrations are initially negligible (<0.1%) but increase rapidly during the first 100  
766 years of ecosystem development in association with nitrogen-fixing species and  
767 accumulating tree biomass; both reach peak concentrations at 500 years and decline  
768 slowly thereafter (29, 38).

769

770 We sampled fungal communities on roots at ten surfaces of the following ages (in  
771 years): <5, 15, 70, 290, 500, 1000, 5000, 12,000, 60,000, 120,000. These sites are  
772 based on those used by Richardson et al. (29), with three differences: the addition of  
773 a <5-year old surface at the glacier forefront and a 1000-year old site, and a 12,000  
774 year old site that was used in the original description (48) of the chronosequence, in  
775 lieu of Richardson et al's (29) 12 kyr. site. Our sites ranged from initial post-glacial  
776 primary succession (gravel bed with sparse grasses and subshrubs, highly nitrogen  
777 limited with abundant phosphorus) through the assembly of a temperate rainforest  
778 (soils ca. 12,000 years old with maximal aboveground biomass limited primarily by P)  
779 and ultimately retrogressive phases (the two sites  $\geq 60$  kyr old having severe nutrient  
780 depletion through pedogenic processes) (29).

781

782 Forests along the chronosequence, and in the region generally, are formed by  
783 associations of broadleaved evergreen angiosperm and long-lived coniferous  
784 (arbuscular mycorrhizal Podocarpaceae) tree species with abundant tree ferns,  
785 lianas and ground ferns (29). Endemic evergreen angiosperms dominate the  
786 youngest sites (from 5 to 290 yr age), and thereafter are replaced by major canopy  
787 dominant tree species, primarily Podocarpaceae; these dominate the plant  
788 community throughout the remainder of the chronosequence. Tree ferns occur  
789 across all the sites except the oldest (120,000 yr) (29); grasses and ericaceous shrubs  
790 are almost absent from the chronosequence, but do form a minor component of the  
791 vegetation on the 15 yr and oldest sites respectively.

792

793 Strong shifts also occur in belowground properties and biota along this sequence,  
794 mirroring the co-ordinated shifts in nutrients, community composition and ecological  
795 processes throughout ecosystem development. Soil microbial communities decline  
796 in diversity and richness along the sequence, and compositionally shift from  
797 bacterial-dominated to fungal-dominated (49). In addition, some bacterial phyla are  
798 common throughout the sequence (e.g., Actinomycetes and alpha-Proteobacteria),  
799 whereas other phyla decline over time (e.g., Bacilli, beta-Proteobacteria, and  
800 Bacteroidetes (50)). Similarly, mycorrhizal fungi are dominated by arbuscular species

801 throughout. Orchid mycorrhizas are present throughout the sequence, but are  
802 extremely rare; ericoid mycorrhizas are present primarily on the oldest, retrogressive  
803 stage (51, 52) (although the ericaceous shrub *Gaultheria* is also present at the 15  
804 year old site); and a plant species capable of forming ectomycorrhizas  
805 (*Leptospermum scoparium*) is present at the oldest site, but no ectomycorrhizal  
806 roots have been observed. In addition, soil microbes and fungi are an increasingly  
807 important pool of P whereby the majority of available (non-occluded) P is retained in  
808 the soil microbial biomass during ecosystem retrogression (53). Activities of the soil  
809 microbial biomass are coordinated such that investment in phosphorous acquisition  
810 increases along the sequence, as demonstrated by a four-fold increase in the major  
811 enzymes used to process phosphorus (phosphomonoesterase and phosphodiesterase  
812 (49, 53)).

813

814 Plant functional leaf and root traits show a co-ordinated shift predictably towards an  
815 increasingly conservative resource-use strategy with increasing surface age, both  
816 within widespread species and through species turnover (29, 54, 55). The sites in the  
817 early (progressive) phase represent the stages typical of ecosystem succession,  
818 whereas the two oldest sites are considered retrogressive (28, 29, 56) due to soil  
819 nutrient limitation.

820

821 Changes in the diversity, abundance and composition of litter and soil-dwelling  
822 invertebrates are less well understood. The abundance of microbial-feeding and  
823 omnivorous nematodes and copepods show unimodal responses along the sequence  
824 in soil, but more complex responses in the litter layer (57). Richness and diversity of  
825 both nematodes and macroinvertebrates differ significantly among stages or sites,  
826 but do not shift consistently throughout ecosystem development. Acari abundance is  
827 bimodal, peaking in early and mid stages of the sequence, whereas diversity  
828 increases throughout. In contrast, Collembola abundance and diversity are both  
829 bimodal, peaking at the earliest and maximal biomass stages. These results suggest  
830 that soil microbial community composition and activity are coordinated along the  
831 sequence, but that other soil biota, such as invertebrates, have more complex  
832 responses; these are likely driven by the relative strength and importance of top-

833 down vs. bottom-up regulation of these taxa (56), but these processes have not yet  
834 been investigated.

835

### 836 Sampling

837 At each site we sampled 50 root fragments of 10 to 20 cm length from the organic or  
838 mineral layer at a depth of 10-30 cm, where the majority of fine roots occur (p.43 in  
839 (58)), with each sample spaced 2 m apart along two parallel 50 m transects. This  
840 depth allowed consistent sampling across all sites (all sites had roots at this depth)  
841 and high replication with minimal site disturbance, but we note that the root and  
842 fungal community below 30 cm was not included. Thus, the frequency with which  
843 plant species appeared in our samples should reflect their relative abundance (or at  
844 least belowground biomass from 10-30 cm) in the site (59), congruent with transect  
845 samples frequently used to sample pollination or host-parasitoid networks (6, 10).  
846 Although species density per unit space (and therefore sampling probability of each  
847 species) may change along the sequence, our analyses do not compare sites with  
848 each other. Rather, we make comparisons within sites of attachment and  
849 detachment probability based on the network role of species. We took the same  
850 number of samples from each depth (10, 20 or 30 cm) at each site, randomly  
851 positioned along each transect, to ensure coverage of different root zones. Roots  
852 were thoroughly washed with tap water to remove any attached soil, then freeze-  
853 dried overnight. Visual inspection suggested that tap water washing was effective at  
854 removing all soil. Additionally, at each site, leaves from the most representative  
855 plants were identified, collected and frozen for molecular analysis. During this  
856 process both root and leaf samples were kept cold (5°C). Root samples then  
857 underwent a molecular analysis to identify the plant species, as well as any AMF  
858 OTUs present inside the root (see Justification of our Sequencing Approach below).  
859 We did not assign weights to the links, as the hypotheses we test here relate to the  
860 initial formation of interactions, rather than their strength or frequency once formed.

861

### 862 Molecular analysis

863 Arbuscular mycorrhizal fungal (Glomeromycota) DNA was amplified using the  
864 universal eukaryotic primer NS31 (60) with the fluorochrome label VIC and the

865 arbuscular mycorrhizal fungal specific primer AML2 (61) labeled with 6FAM, cleaned,  
866 and analyzed using terminal restriction fragment length polymorphism (T-RFLP (62)).  
867 Network analysis of plant-fungal interactions across gradients requires a high level of  
868 replication of small individual samples (< 0.2 mg root) within sites. As an effective  
869 way to achieve this within limited budgets we used T-RFLP on individual roots (62).  
870 At the time the samples were run it was not possible to achieve cost-effect next-  
871 generation sequencing of highly replicated samples (n > 500), however we did pool  
872 samples for next-generation sequencing (454-pyrosequencing) at the level of site (n  
873 = 10). This comparison showed that the T-RFLP results captured similar patterns in  
874 community composition and beta-diversity as next-generation sequencing (15), and  
875 recent work suggests that these approaches can be as effective as deep sequencing  
876 for detecting ecological patterns in microbial communities (63).

877

878 A subsample of 0.15 mg of each root was ground in a bead beater, then extracted  
879 with Power Soil DNA Isolation Kit (Mo-Bio Labs, Carlsbad, CA, USA). Polymerase  
880 chain reactions (PCRs) were carried out in a final volume of 20  $\mu$ l, with 1 $\mu$ l of DNA  
881 extract, 0.4 $\mu$ M of each primer, 0.2mM dNTP's, 2mM MgCl<sub>2</sub>, 0.2 mg/ml BSA (New  
882 England BioLabs, Ipswich, MA, USA) and 0.05U/ $\mu$ l Fast Taq DNA polymerase (Roche  
883 Diagnostics N.Z., Ltd., Auckland, New Zealand). Thermal cycling for the PCRs started  
884 with an initial denaturing step at 94°C for 3 min, followed by 35 cycles of 30 seconds  
885 at 94°C, 1 min at 58°C and 1 min at 72°C, and ended with a final extension step of  
886 72°C for 10 min. Five per cent of the PCRs did not amplify. For those samples, a  
887 nested PCR was used combining a first PCR with NS1 and NS4 (universal fungal  
888 primers (64)) as above, except that primer concentration was 0.1  $\mu$ M and annealing  
889 temperature 40°C, followed by NS31-VIC and AML2-6FAM. PCR products were  
890 purified using DNA Clean & Concentrator Kit (Zymo Research Corporation, Irvine, CA,  
891 USA).

892

893 T-RFLP restriction enzymes were chosen by running virtual digestions of 189  
894 commercial restriction enzymes on the 10 most abundant sequences of a  
895 pyrosequencing library generated from the pooled PCR products. Using virtual  
896 digestions of 189 commercial restriction enzymes run on the 10 most abundant

897 arbuscular mycorrhizal sequences resulting from pyrosequencing, we selected the  
898 enzymes HinfI (Life Technologies New Zealand Ltd., Auckland, New Zealand) and MspI  
899 (New England BioLab) as having the greatest ability to distinguish molecular  
900 Operational Taxonomic Units (OTUs). Clean PCR products were digested for 6 h and  
901 1 h respectively and denatured using HiDi formamide mixed with MapMarker 1000  
902 ROX standard (BioVentures, Murfreesboro TN, USA). Terminal restriction fragments  
903 (TRFs) were separated by capillary electrophoresis using a Prism 3100 Genetic  
904 Analyzer (Applied Biosystems) at the University of Canterbury Sequencing Centre  
905 (Christchurch, New Zealand).

906

907 The TRAMPR package (62) for R (40) was used to process TRFLP data. Peaks with a  
908 height  $\leq 20\%$  the height of the largest peak were ignored as background noise. The  
909 *build.knowns* function from the TRAMPR package (with default settings) was used to  
910 define TRFLP-OTUs by the highest peak from each restriction enzyme direction  
911 (forward and reverse). TRFLP gave a total of 34 OTUs. For brevity, we henceforth  
912 refer to fungal OTUs as “species”.

913

#### 914 Plant amplification and sequencing

915 Plant DNA from leaf and root samples was extracted using the Intron Plant DNA  
916 extraction kit (Intron Biotechnology, Gyeonggi-Do, Korea) and amplified using the  
917 chloroplast trnL (UAA) gene primers c and d (65). These primers failed to amplify  
918 DNA from fern species, hence specific fern primers trnL- f and trn- Fern (66) were  
919 used to amplify the DNA in the root samples for which PCR failed using trnL-c-d  
920 primers. Amplicons from both leaf and root samples were purified using ExoI and  
921 Sap enzyme (Thermo Fisher Scientific, Auckland New Zealand) and sequenced at the  
922 University of Canterbury Sequencing Centre (Christchurch, New Zealand). Plant  
923 species were identified based on BLAST matches to GenBank at 98% similarity,  
924 including sequences from our vouchered plant leaf collections (GenBank KF591217 -  
925 KF591315; KF591316 - KF591341).

926

#### 927 Justification of sequencing approach

928 DNA-based methods not only provide an efficient means of data collection, but they  
929 also allow the identification of cryptic taxa or those that are difficult to culture, and  
930 are thus being increasingly used to document interactions among species for  
931 network studies (67, 68). By sampling root tissue, we isolated fungi that were  
932 symbiotic with the plant, but to be conservative we avoid assigning any direction to  
933 the interactions, as they may be mutualistic, commensalistic or antagonistic,  
934 depending on the taxa involved or their environmental context (68-70). This is  
935 analogous to other network types where, for example, the visitation of flowers does  
936 not necessarily imply successful pollination and fruit feeding does not imply  
937 successful seed dispersal. We used the colonization of plant species by AMF species  
938 at each site to generate community plant-AMF interaction networks, as in previous  
939 studies (12, 36, 68).

940

941 *Controlling for the effect of species abundances in attachment and detachment*  
942 *analyses*

943 Abundant species have a greater probability of being observed engaging in  
944 interactions with others, which could make them more connected and/or central in  
945 the interaction network. Likewise, if newly-arriving species interact with others at  
946 random, they have a greater likelihood of interacting with abundant species by  
947 chance. In this way, the abundance of species could drive both their network  
948 position and probability of being attached to or detached from. Although the  
949 processes of preferential attachment and detachment would still be useful to  
950 understand, even if they were driven by abundances, we tested explicitly whether  
951 centrality and degree affected attachment and detachment probability, after  
952 controlling for differences in the abundance of species.

953

954 We first tested whether the abundance of species determined their network position  
955 (centrality and/or degree), then we tested whether the preferential attachment  
956 results changed after controlling for species abundances. To test these possibilities,  
957 it is necessary to have an independent measure of species abundances from the site.  
958 Defining and measuring the abundance of individual mycorrhizal fungal taxa in the  
959 field presents numerous difficulties (71). Nevertheless, to account for their sampling

960 effort (rather than their ‘abundance’ as it would be perceived by a plant), we used  
961 their frequency in our samples (i.e. the number of plant root samples in which they  
962 were detected). However, plant abundances can be measured easily aboveground,  
963 and aboveground biomass/percentage cover has been shown to correlate with  
964 belowground biomass, which would be more important for belowground  
965 interactions.

966  
967 All vascular plant species rooted within each plot were identified to species, and  
968 percentage cover measured using a relevé plot method. Briefly, cover was assessed  
969 visually as cover classes (<1%, 1–5%, 6–25%, 26–50%, 51–75%, 76–95% and >95%)  
970 within each of four height tiers (0–0.3 m, 0.3–2 m, 2–5 m, 5–12 m) following  
971 standard vegetation survey protocols (72). The midpoint for each cover class used to  
972 calculate percentage cover. We first tested whether the percentage cover of a plant  
973 species was a good predictor of its network centrality. We used a linear mixed  
974 effects model with closeness centrality as the response variable and percent cover as  
975 the predictor, with site age (chronosequence stage) as a random effect. We then ran  
976 an analogous model to test for an effect on plant degree. Because we did not have  
977 an independent measure of fungal abundance, we used their frequency in our  
978 samples (i.e. the number of plant root samples in which they were detected) as a  
979 surrogate for their abundance.

980  
981 We first tested whether the percentage cover of a plant species was a good  
982 predictor of its network centrality. We used a linear mixed effects model with  
983 closeness centrality as the response variable and percent cover as the predictor, with  
984 site age (chronosequence stage) as a random effect. We then ran an analogous  
985 model to test for an effect on plant degree. We also re-ran our earlier models for  
986 preferential attachment including abundance of each species as a covariate.

987

### 988 *Simulations of preferential attachment and detachment*

989 Our finding that preferential attachment was explained better by centrality than by  
990 degree raises the question of how these differing non-random processes affect the  
991 final outcome of the network produced. The overall plant-AMF network architecture



992 was significantly nested ( $P = 0.009$ , measured using NODF), as observed in previous  
993 plant-mycorrhizal networks (12). We therefore assessed the extent to which  
994 (linear) preferential attachment and detachment, based on centrality vs. degree,  
995 would affect the nestedness of networks. To do this, we conducted a set of  
996 simulations of network assembly and disassembly scenarios. In each replicate of the  
997 assembly process, we began with a network comprising four species (two plants and  
998 two arbuscular mycorrhizal fungi, AMF), with three interactions among them. One  
999 species of plant and one AMF each had two interactions, and the remaining two  
1000 species had one interaction (this could be visualized as an upside-down 'L' in the  
1001 adjacency matrix). Note that if we began with a smaller matrix (e.g. only one  
1002 interaction between two species), a newly-arriving AMF species would have no  
1003 option but to interact with the single plant species. Then a newly-arriving plant  
1004 would choose between the two fungi with equal probability (they would have the  
1005 same degree and centrality), and this would inevitably produce the matrix with  
1006 which we began.

1007

1008 From this starting network, we simulated the arrival of new AMF and plant species  
1009 (alternating between the trophic levels) through time, until the network contained  
1010 50 plants and 50 fungi. At each time step, the newly-arriving species would interact  
1011 with one existing species, with a probability proportional to the existing species'  
1012 degree (i.e. the Barabasi and Albert model (4)) or closeness centrality. We also ran a  
1013 third scenario whereby attachment was random (equally probable attachment to  
1014 any existing species), to provide a null point of comparison. In the random  
1015 attachment scenario, the lifetime probability of receiving new attachments (i.e.  
1016 'fitness' in network, but not Darwinian terminology) was proportionate to the arrival  
1017 order of species. Each newly-arriving species initially only interacted with one  
1018 existing species, but it could also potentially interact with other species that arrived  
1019 later.

1020

1021 After this assembly phase, each network was subjected to a disassembly phase,  
1022 using the same scenario (degree-based, centrality-based or random) as was used  
1023 during that network's assembly. Alternating plant and AMF species were removed

1024 (i.e. went extinct) with a probability that was inversely proportional to the degree or  
1025 closeness centrality of the species with which they interacted, such that species that  
1026 interacted with species of high degree or high centrality were less likely to go extinct.  
1027 If a species interacted with more than one other species, its detachment probability  
1028 was determined by the mean degree or centrality of those species. If, after a species  
1029 went extinct, other species were left unconnected (i.e. their only interaction partner  
1030 went extinct), these unconnected species were also deemed to have gone  
1031 secondarily extinct. As with the assembly phase, we ran a scenario of the  
1032 disassembly phase whereby extinction was random. The simulated extinction of  
1033 plant or AMF species proceeded until there remained only two species at that  
1034 trophic level or until the network became too small to accurately calculate centrality.  
1035 If only one trophic level met these criteria (e.g. if there remained only two plant  
1036 species, but more than two AMF species), then the other trophic level continued to  
1037 suffer extinctions until it also met the criteria (in Fig. S4, this results in primary  
1038 extinctions that begin as multiples of two then eventually include single extinctions).  
1039 Consequently, the number of primary extinctions during disassembly did not  
1040 consistently increase by two during every time step, unlike the assembly phase,  
1041 where two species attached in each time step.

1042

1043 Each scenario of the assembly and disassembly phases was run for 1000 replicates  
1044 (each comprising multiple time steps). At each time step within each replicate, after  
1045 species arrived or went extinct, we recorded the nestedness of the network.  
1046 Nestedness is a network pattern whereby specialist species interact with a subset of  
1047 the species that interact with generalists. It is a common feature of mutualistic  
1048 networks (46), which has also been observed recently in plant-mycorrhizal networks  
1049 (12) and has been shown to increase the persistence of networks (1, 2).

1050

1051 We calculated the nestedness of the network using NODF, calculated using the  
1052 nestednodf function in the vegan package (45) for R. Because this measure could be  
1053 influenced by network size, we scaled the observed NODF by the distribution of  
1054 NODF values obtained by randomizing the adjacency matrix using the null model  
1055 ("Null model II") of Bascompte et al. (46). For each network at each time step, we

1056 ran 99 iterations of the null model, each time calculating NODF. We subtracted the  
1057 mean NODF value of the resulting null distribution from the observed NODF of the  
1058 network, and divided the result by the standard deviation of the null distribution.  
1059 This provided a standardized measure of the extent to which the nestedness of the  
1060 network at each time step differed from null expectations for a network of that size.  
1061

1062 **SI Results**

1063 *There was no change in network structure along the chronosequence*

1064 Previous work has shown that some attributes of network structure can be rapidly  
1065 detected even with small samples from networks (37). This suggests that overall  
1066 network architecture, such as interaction nestedness, could emerge quickly during  
1067 ecosystem development (i.e. even when the network is small), provided that  
1068 preferential attachment and detachment processes occur from the outset of  
1069 network formation.

1070

1071 We therefore analyzed how nestedness and other metrics of network structure  
1072 changed along the chronosequence using general linear models (or Poisson  
1073 generalized linear models in the case of richness) with the metric as the response  
1074 variable, and log site age as the predictor. As metrics to describe network structure,  
1075 we tested two measures of nestedness (nestedness temperature and NODF),  
1076 connectance, both quantitative and binary versions of linkage density, quantitative  
1077 interaction evenness, and species richness of plants and mycorrhizas. To allow for  
1078 the possibility that the relationship between network metrics and site age was non-  
1079 linear, we included a quadratic term for site age. We also included sample size (the  
1080 number of root samples where both the plant species and at least one fungal species  
1081 were identified) as a covariate to account for any potential sampling biases. We then  
1082 simplified each of these models by removing variables and minimizing the Akaike  
1083 Information Criterion (AIC).

1084

1085 In our networks, nestedness did not change significantly across the chronosequence  
1086 (Table S3), as would be expected if the strength of preferential attachment was  
1087 consistent across the chronosequence. In fact, no measure of structure changed with  
1088 ecosystem development (Table S3, Fig. S2), congruent with previous studies of the  
1089 assembly of pollination network and food web structures (6, 73, 74). In contrast, a  
1090 comparison of early and late successional forests found two (connectance and  
1091 specialization) out of six measures of plant-AMF network structure changed (36),  
1092 though these changes could have been caused by changes in the diversity of  
1093 potential interaction partners. Despite the macroscopically static structure we

1094 observed, there was high turnover of species and interactions, with new species  
1095 joining the network and others no longer occurring at each stage along the sequence  
1096 (Table S1).

1097

1098

1099 *Effect of species abundances on results*

1100 The effect of plant percent cover on centrality was significant ( $t = 3.24$ ,  $P = 0.002$ ),  
1101 though the effect size was small (slope = 0.000217). For example, if a species'  
1102 percent cover changed by 11% (which would be equivalent to changing from the  
1103 lower quartile to the upper quartile), its fitted value for centrality would increase  
1104 only by 0.002 (which is an order of magnitude less than one standard deviation for  
1105 centrality, s.d. = 0.029). We note, however, that plant percent cover significantly  
1106 predicted plant normalized degree ( $t = 6.55$ ,  $P = 2.46 \times 10^{-9}$ ), with a larger effect size  
1107 (slope for the effect of percent cover on normalized degree = 0.010). The abundance  
1108 of AMF taxa in samples significantly predicted their centrality (log transformed to  
1109 make relationship linear:  $t = 8.32$ ,  $P < 0.0001$ ) and normalized degree ( $t = 21.71$ ,  $P <$   
1110  $0.0001$ ).

1111

1112 Thus, unsurprisingly, the network position of species was correlated with their  
1113 abundance. However despite this, the influence of plant centrality on attachment  
1114 and detachment probability of fungi remained significant (Table S4), even after  
1115 controlling for species abundances (i.e. including abundance as a covariate to test  
1116 whether centrality affected attachment or detachment probability at a given level of  
1117 abundance). We used aboveground cover as a measure of plant abundance, which  
1118 had the advantage of being measured independently from our plant-AMF  
1119 associations. However, in case aboveground cover was not correlated with root  
1120 abundance, we repeated the analyses with the abundance of each plant species in  
1121 the root samples as a covariate, and the effect of plant centrality on fungal  
1122 attachment remained significant (Table S4). In fact, plant abundance (using either  
1123 measure) was not significantly correlated with AMF attachment probability (Table  
1124 S4), though there was a non-significant tendency for AMF detachment probability to  
1125 increase with plant abundance. In contrast to this consistent relation between

1126 attachment or detachment and centrality, the relation between normalized degree  
1127 and attachment or detachment probability of AMF became non-significant when  
1128 abundance (either aboveground cover or abundance in samples) was included as a  
1129 covariate (  $|t| < 1$ ,  $P > 0.343$  in both cases). This indicates that any of the variance in  
1130 attachment or detachment probability that was attributable to normalized degree  
1131 was also collinear with plant abundance, due to the strong correlation between  
1132 abundance and degree.

1133

1134 Plants did not show any preferential attachment in the original analyses (Table S2),  
1135 and the addition of abundance as a covariate did not alter this (Table S4). However,  
1136 the formerly significant effect of AMF centrality on plant detachment probability  
1137 became non-significant when the abundance of AMF taxa in samples was added as a  
1138 covariate in the models. Moreover, the non-significant trend towards a positive  
1139 correlation between AMF degree and plant detachment probability became  
1140 significant when abundance was included in the model, in contrast with previous  
1141 studies showing that species with high-degree are more likely to retain interactions  
1142 and their partners have a reduced probability of extinction (7, 10).

1143

1144

1145

1146 **SI Figure legends**

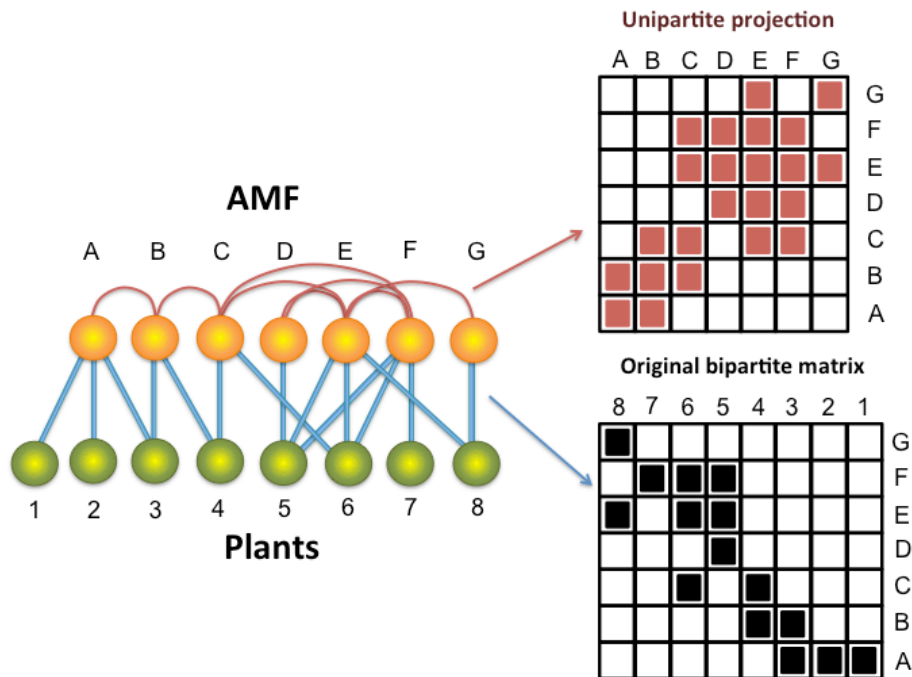

1147

1148 **Fig. S1 Measurement of partner overlap.** Illustration of a network of interactions  
1149 among plants and arbuscular mycorrhizal fungi (AMF). The network can be depicted  
1150 as a bipartite matrix, where black squares indicate the presence of an interaction  
1151 ('link') in the network. A unipartite projection of this network can also be generated  
1152 for each trophic level (here depicted in red, only for AMF), whereby species are  
1153 linked when they share an interaction partner. This unipartite projection depicts  
1154 interaction-partner overlap among species. We then measured each species' partner  
1155 overlap as 'closeness centrality': the inverse of the mean path length (i.e. 'degrees of  
1156 separation') from the focal species to all others in the unipartite projection. This  
1157 distance has also been called 'functional specialization' (43). For example, species E  
1158 is connected directly to species C, D, F and G, has two steps to species B (via C) and  
1159 three steps to species A (via C and B). This gives species E a mean path length of 1.5  
1160 to any other species, which is the shortest mean path length and the highest  
1161 closeness centrality of any AMF species. Species A and G have the same number of  
1162 links in the unipartite projection (1 link), but G shares a plant partner with species E  
1163 that shares partners with many others in the network (mean path length of G = 2.3).  
1164 In contrast, A shares a partner with species B, which itself only shares partners with  
1165 A and C. Thus, A has a lower overall partner overlap (mean path length = 2.83)

1166 because it does not share partners with plants in the largest cluster of interacting

1167 species.

1168



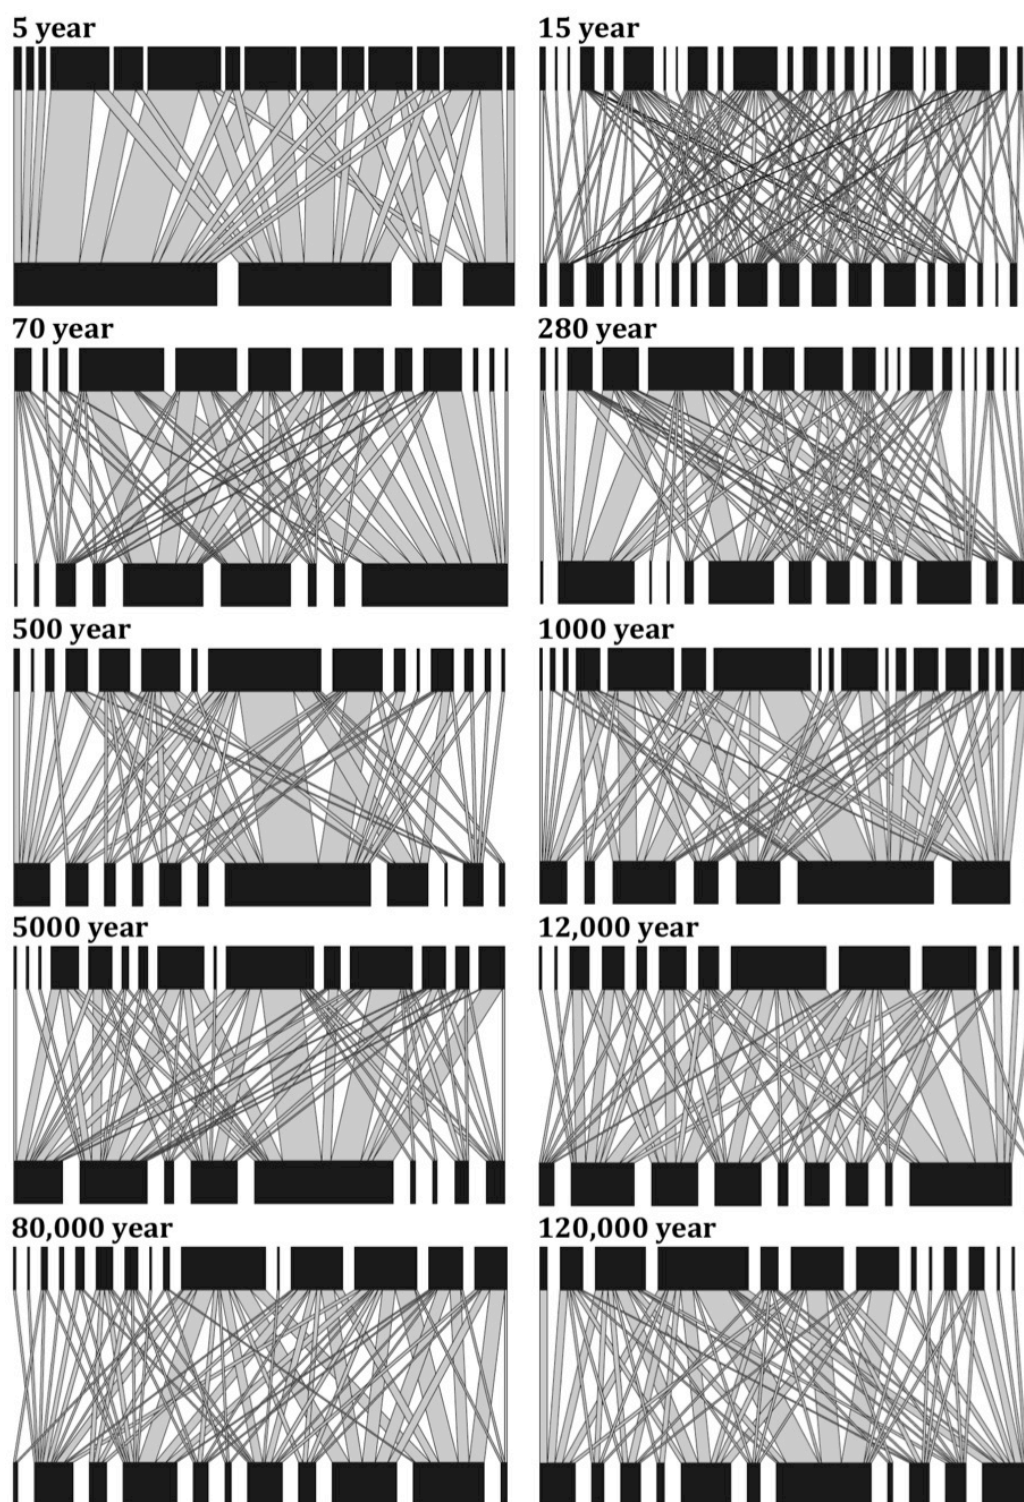

1169

1170 **Fig. S2 Plant-AMF networks along chronosequence.**

1171 Quantitative networks are shown (whereby the width of links indicates their relative

1172 frequency). However, binary (links unweighted) networks were used for analysis

1173 because frequency of association is not an unbiased measure of interaction

1174 frequency in plant-mycorrhizal associations (69).

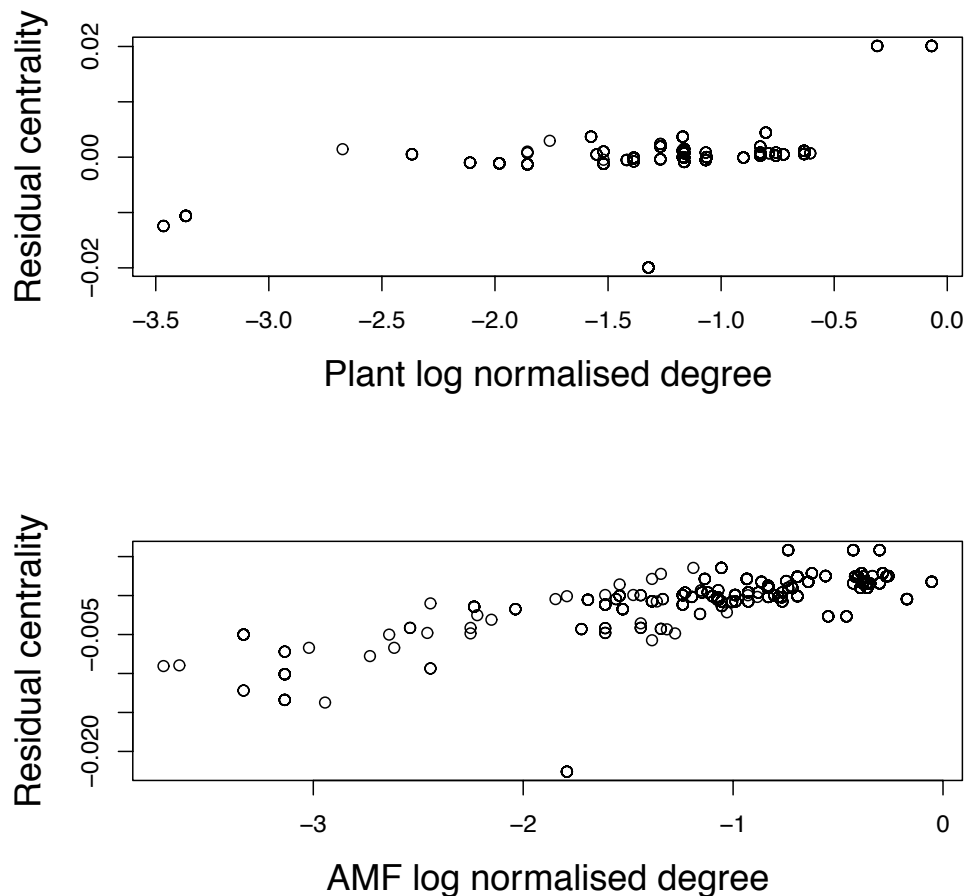

1175

1176 **Fig. S3 Relationship between normalized degree and centrality.** Because we  
1177 compared preferential attachment based on interaction-partner overlap (defined as  
1178 'closeness centrality', Fig. S1 ) with a similar process based on degree, we tested  
1179 whether degree and centrality were correlated. We conducted Gaussian mixed  
1180 effects models with normalized degree (log transformed) as the predictor variable  
1181 and closeness centrality as the response. To account for the non-independence of  
1182 species from a given site, site age was included as a random effect. Mixed effects  
1183 models were conducted in the 'lme4' package (39) for R. P values for the models  
1184 were estimated using degrees of freedom calculated with the Satterthwaite method  
1185 of denominator synthesis, carried out in the 'lmerTest' package (75) for R. In the  
1186 figure, degree is log transformed and closeness centrality is presented as residuals  
1187 after removing variation due to random effects. All relationships were significantly  
1188 positive (mixed effects models:  $t > 13$ ,  $P < 0.0001$  in all cases).

1189

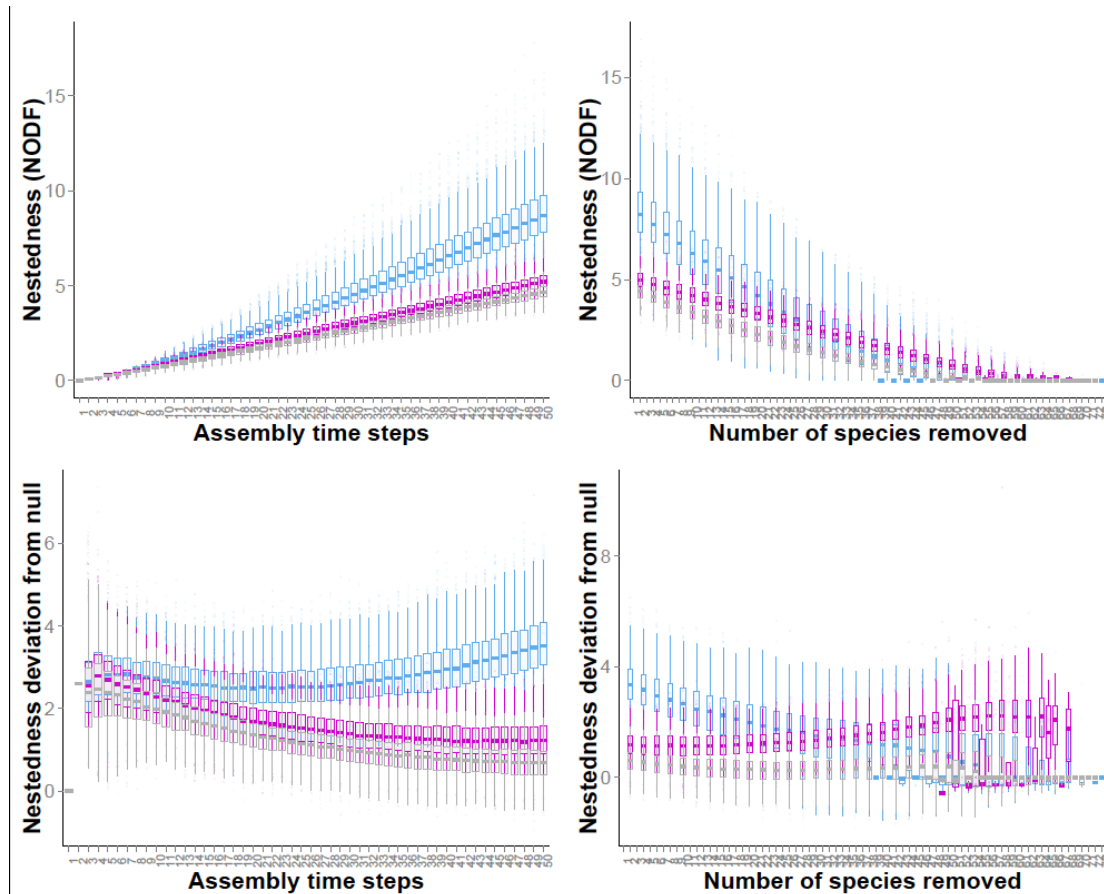

1190

1191 **Fig. S4 Changes in interaction nestedness during simulated assembly and**  
1192 **disassembly phases.** Nestedness (raw NODF top row, deviation from null  
1193 expectation bottom row) during simulated arrival (left column) and extinction (right  
1194 column) of plant and AMF species. Each scenario was run for 1000 replicates. Dark  
1195 horizontal lines show median values, boxes show upper and lower quartiles, and  
1196 whiskers show minima and maxima (with points signaling extreme values). The  
1197 scenarios were preferential attachment or detachment based on the degree (blue)  
1198 or closeness centrality (purple) of interaction partners (or inverse of degree and  
1199 centrality for detachment). For comparison, random extinctions are presented in  
1200 grey. Both assembly and disassembly phases had notable impacts on network  
1201 nestedness. During the assembly phase, the scenario based on preferential  
1202 attachment to high-degree nodes produced networks that were highly nested, and  
1203 considerably more nested than the other two scenarios. Nestedness tended to  
1204 increase with network size (through time), emphasizing the need to compare raw  
1205 nestedness against a null model. When compared against null expected nestedness,  
1206 only the degree-based scenario had increasing nestedness through time. In contrast,

1207 the centrality-based and random assembly scenarios showed a slight decrease in  
1208 nestedness through time (as the addition of new nodes diluted the legacy of the  
1209 starting matrix, which was highly nested). Despite this, the centrality-based scenario  
1210 was consistently more nested than the random attachment scenario. Importantly,  
1211 the differences between the degree- and centrality-based scenarios were reversed  
1212 during the disassembly phase. As progressively more species were removed, the  
1213 degree-based scenario showed a rapid decline in nestedness, whereas the centrality-  
1214 based scenario became slightly more nested than null expectation (and more nested  
1215 than the centrality-based scenario).  
1216

1217 **Table S1: Site details.**

1218 Details of site locations (Lat. = latitude, Long. = longitude), stage of ecosystem development, the  
 1219 number of plant and arbuscular mycorrhizal fungal (AMF) taxa sampled and interactions (Links)  
 1220 between them (with cumulative numbers up to, and including, that site in parentheses), and site  
 1221 conditions. Additional details can be found in Richardson et al. (30) and updated in Holdaway et al.  
 1222 (69).

| Site age (years) | Stage         | Lat.   | Long.  | Dominant vegetation               | Plant taxa | AMF taxa | Links     |
|------------------|---------------|--------|--------|-----------------------------------|------------|----------|-----------|
| <5               | Progressive   | -43.25 | 170.10 | sparse herbfield                  | 6          | 15       | 37        |
| 15               | Progressive   | -43.42 | 170.16 | tall shrubland                    | 20 (23)    | 24 (29)  | 113 (140) |
| 70               | Progressive   | -43.42 | 170.16 | early successional forest         | 9 (28)     | 13 (29)  | 57 (180)  |
| 290              | Progressive   | -43.41 | 170.18 | broadleaved forest                | 13 (35)    | 19 (32)  | 73 (239)  |
| 500              | Progressive   | -43.41 | 170.17 | broadleaved forest                | 11 (38)    | 15 (32)  | 55 (272)  |
| 1000             | Progressive   | -43.40 | 170.17 | tall broadleaved forest           | 8 (41)     | 17 (32)  | 61 (307)  |
| 5000             | Progressive   | -43.40 | 170.17 | tall broadleaved forest           | 9 (43)     | 15 (32)  | 61 (321)  |
| 12,000           | Peak biomass  | -43.33 | 170.21 | tall broadleaved-podocarp forest  | 10 (46)    | 13 (32)  | 55 (344)  |
| 60,000           | Retrogressive | -43.24 | 170.30 | broadleaved-podocarp forest       | 11 (48)    | 15 (33)  | 64 (359)  |
| 120,000          | Retrogressive | -43.25 | 170.19 | short broadleaved-podocarp forest | 11 (53)    | 14 (33)  | 61 (399)  |

1223

1224

1225 **Table S2: Coefficients tables from attachment and detachment models for plants and arbuscular**  
 1226 **mycorrhizal fungi (AMF).** Coefficients tables for fixed effects component of generalised linear mixed  
 1227 models testing for correlation between attachment and detachment probability and (closeness)  
 1228 centrality (our measure of interaction-partner overlap, see Fig. S1) or degree. Response variables are  
 1229 binary (attached/detached vs. did not attach/detach), and a binomial error distribution with a logit link  
 1230 function was used. All models had site included as a random factor to control for the non-independence  
 1231 of any new associations occurring at the same point along the chronosequence. Separate models are  
 1232 presented for (normalized) degree vs. centrality, as described in the main text. Additional models are  
 1233 presented with both centrality and degree to demonstrate that the significance and direction of effect for  
 1234 centrality does not change (though that of degree does in some cases). For each response variable, the  
 1235 best-fitting model (lowest AIC) is in bold.  
 1236  
 1237  
 1238

| Response variable            |                    | Estimate        | Std. Error    | Z             | P                  | AIC          |
|------------------------------|--------------------|-----------------|---------------|---------------|--------------------|--------------|
| AMF attachment probability   | (Intercept)        | -8.651          | 3.938         | -2.197        | 0.028              | 60.2         |
|                              | Degree             | -1.112          | 1.325         | -0.839        | 0.401              |              |
|                              | (Intercept)        | -5.862          | 0.886         | -6.616        | < 0.0001           | 58.1         |
|                              | Centrality         | 31.720          | 5.591         | 5.674         | < 0.0001           |              |
|                              | <b>(Intercept)</b> | <b>-5.733</b>   | <b>1.131</b>  | <b>-5.067</b> | <b>&lt; 0.0001</b> | <b>53.8</b>  |
|                              | <b>Centrality</b>  | <b>44.248</b>   | <b>8.899</b>  | <b>4.972</b>  | <b>&lt; 0.0001</b> |              |
|                              | <b>Degree</b>      | <b>-3.973</b>   | <b>1.633</b>  | <b>-2.433</b> | <b>0.015</b>       |              |
| Plant attachment probability | (Intercept)        | -0.384          | 0.444         | -0.864        | 0.388              | 522.3        |
|                              | Degree             | -0.112          | 0.534         | -0.209        | 0.835              |              |
|                              | <b>(Intercept)</b> | <b>-1.065</b>   | <b>0.865</b>  | <b>-1.231</b> | <b>0.218</b>       | <b>522.0</b> |
|                              | <b>Centrality</b>  | <b>15.972</b>   | <b>19.968</b> | <b>0.800</b>  | <b>0.424</b>       |              |
|                              | (Intercept)        | -1.747          | 0.975         | -1.793        | 0.073              | 523.1        |
|                              | Centrality         | 40.984          | 27.932        | 1.467         | 0.142              |              |
|                              | Degree             | -0.734          | 0.700         | -1.048        | 0.295              |              |
| AMF detachment probability   | (Intercept)        | -3.259          | 1.256         | -2.595        | 0.009              | 421.9        |
|                              | Degree             | 1.820           | 0.885         | 2.057         | 0.040              |              |
|                              | (Intercept)        | 1.084           | 0.537         | 2.019         | 0.044              | 417.7        |
|                              | Centrality         | -95.425         | 22.235        | -4.292        | < 0.0001           |              |
|                              | <b>(Intercept)</b> | <b>0.834</b>    | <b>0.632</b>  | <b>1.320</b>  | <b>0.187</b>       | <b>411.4</b> |
|                              | <b>Centrality</b>  | <b>-121.885</b> | <b>28.563</b> | <b>-4.267</b> | <b>&lt; 0.0001</b> |              |
|                              | <b>Degree</b>      | <b>2.646</b>    | <b>0.934</b>  | <b>2.835</b>  | <b>0.005</b>       |              |
| Plant detachment probability | (Intercept)        | -0.256          | 0.589         | -0.435        | 0.664              | 602.5        |
|                              | Degree             | 0.247           | 0.442         | 0.558         | 0.577              |              |
|                              | (Intercept)        | 2.252           | 0.327         | 6.890         | < 0.0001           | 593.8        |
|                              | Centrality         | -48.616         | 7.554         | -6.436        | < 0.0001           |              |
|                              | <b>(Intercept)</b> | <b>2.149</b>    | <b>0.329</b>  | <b>6.527</b>  | <b>&lt; 0.0001</b> | <b>593.2</b> |
|                              | <b>Centrality</b>  | <b>-54.633</b>  | <b>8.486</b>  | <b>-6.438</b> | <b>&lt; 0.0001</b> |              |
|                              | <b>Degree</b>      | <b>0.759</b>    | <b>0.476</b>  | <b>1.594</b>  | <b>0.111</b>       |              |

1239  
 1240  
 1241  
 1242  
 1243  
 1244  
 1245  
 1246  
 1247  
 1248  
 1249  
 1250

**Table S3: No significant change in network architecture along the chronosequence.** Results of best-fitting models for each metric of plant-mycorrhizal network structure (response variable) and any predictor variables that were retained after model simplification. The maximal model contained sample size (number of samples yielding an identifiable sequence) and site age and a quadratic site age term (to allow for nonlinear relationships) as predictors. We compared all subsets of this maximal model and selected the best-fitting model with the lowest AIC score. Raw P values are provided, though these are non-conservative because multiple testing increases the probability of Type I error. Where no predictors are given, the best-fitting model contained only an intercept. No measure of network structure changed significantly along the chronosequence.

| <b>Response</b>          | <b>Predictor</b>            | <b>D.F.</b> | <b>F</b> | <b>P</b> |
|--------------------------|-----------------------------|-------------|----------|----------|
| Nestedness (NODF)        | Sample size                 | 1,8         | 4.3      | 0.073    |
| Nestedness temperature   | Sample size                 | 1,8         | 1.9      | 0.207    |
| Connectance              | < none >                    |             |          |          |
| Binary linkage density   | < none >                    |             |          |          |
| Weighted linkage density | Sample size                 | 1,6         | 1.7      | 0.234    |
|                          | Log site age                | 1,6         | 0.0      | 0.931    |
|                          | (Log site age) <sup>2</sup> | 1,6         | 1.6      | 0.253    |
| Interaction evenness     | Sample size                 | 1,8         | 4.1      | 0.077    |
| Plant richness           | < none >                    |             |          |          |
| Mycorrhizal richness     | Sample size                 | 1,6         | 3.4      | 0.113    |
|                          | Log site age                | 1,6         | 0.2      | 0.697    |
|                          | (Log site age) <sup>2</sup> | 1,6         | 3.0      | 0.133    |

1251  
 1252

1253 **Table S4: Coefficients tables for preferential attachment and detachment models with centrality**  
 1254 **as predictor, controlling for abundance.** Coefficients tables for fixed effects component of  
 1255 generalized linear mixed models testing for correlation between attachment and detachment probability  
 1256 and closeness centrality, our measure of interaction-partner overlap (see Fig. S1). This table is  
 1257 analogous to Table S2), but with the abundance of species included as a covariate. The abundance  
 1258 refers to that of the interaction partner (not the species attaching), and is measured using the  
 1259 aboveground percent cover for plants and the abundance in samples (number of roots in which it  
 1260 occurred) for the fungi. For completeness, we also present models with plant abundance measured  
 1261 using the number of samples in which it occurred (as with fungi).  
 1262

| <b>Response variable</b>     |                  | <b>Coefficient</b> | <b>Std. Error</b> | <b>Z</b> | <b>P</b> |
|------------------------------|------------------|--------------------|-------------------|----------|----------|
| AMF attachment probability   | (Intercept)      | -5.925             | 1.366             | -4.339   | < 0.0001 |
|                              | Percent cover    | 0.004              | 0.063             | 0.062    | 0.951    |
|                              | Centrality       | 32.057             | 7.879             | 4.069    | < 0.0001 |
|                              | (Intercept)      | -5.681             | 1.370             | -4.147   | < 0.0001 |
|                              | Sample abundance | -0.020             | 0.119             | -0.165   | 0.869    |
|                              | Centrality       | 31.016             | 6.862             | 4.52     | < 0.0001 |
| Plant attachment probability | (Intercept)      | -1.092             | 1.181             | -0.925   | 0.355    |
|                              | Sample abundance | -0.001             | 0.010             | -0.067   | 0.946    |
|                              | Centrality       | 16.921             | 30.149            | 0.561    | 0.575    |
| AMF detachment probability   | (Intercept)      | 0.305              | 0.254             | 1.203    | 0.229    |
|                              | Percent cover    | 0.011              | 0.006             | 1.813    | 0.070    |
|                              | Centrality       | -72.357            | 9.615             | -7.525   | < 0.0001 |
|                              | (Intercept)      | 0.275              | 0.267             | 1.028    | 0.304    |
|                              | Sample abundance | 0.024              | 0.014             | 1.772    | 0.076    |
|                              | Centrality       | -72.342            | 10.088            | -7.171   | < 0.0001 |
| Plant detachment probability | (Intercept)      | 0.196              | 1.110             | 0.176    | 0.860    |
|                              | Sample abundance | 0.008              | 0.003             | 2.368    | 0.018    |
|                              | Centrality       | -9.550             | 21.276            | -0.449   | 0.654    |

1263  
 1264
